Menon *et al.*: Ecological speciation in pines

1 **Running title: Ecological speciation in pines**

2

3 **The role of hybridization during ecological divergence of southwestern white**  
4 **pine (*Pinus strobiformis*) and limber pine (*P. flexilis*)**

5 MITRA MENON<sup>1,2\*</sup>, JUSTIN C. BAGLEY<sup>2,3</sup>, CHRISTOPHER FRIEDLINE<sup>2</sup>, AMY V. WHIPPLE<sup>4</sup>, ANNA W.  
6 SCHOETTLE<sup>5</sup>, ALEJANDRO LEAL-SAENZ<sup>13</sup>, CHRISTIAN WEHENKEL<sup>6</sup>, FRANCISCO MOLINA-  
7 FREANER<sup>7</sup>, LLUVIA FLORES-RENTERIA<sup>8</sup>, M. SOCORRO GONZALEZ-ELIZONDO<sup>9</sup>, RICHARD A.  
8 SNEZKO<sup>10</sup>, SAMUEL A. CUSHMAN<sup>11</sup>, KRISTEN M. WARING<sup>12</sup>, AND ANDREW J. ECKERT<sup>2\*</sup>

9 <sup>1</sup>*Integrative Life Sciences, Virginia Commonwealth University, Richmond, VA*  
10 *23284, USA.* <sup>2</sup>*Department of Biology, Virginia Commonwealth University, Richmond, VA 23284,*  
11 *USA.* <sup>3</sup>*Departamento de Zoologia, Universidade de Brasília, 70910-900Brasília, DF,*  
12 *Brazil.* <sup>4</sup>*Department of Biological Sciences and Merriam Powel Center for Environmental*  
13 *Research, Northern Arizona University, Flagstaff, AZ 86011, USA.* <sup>5</sup>*Rocky Mountain Research*  
14 *Station, USDA Forest Service, Flagstaff, AZ 86001, USA.* <sup>6</sup>*Instituto de Silvicultura e Industria de*  
15 *la Madera, Universidad Juarez del Estado de Durango, 34120 Durango, MX.* <sup>7</sup>*Institutos de*  
16 *Geologia y Ecologia, Universidad Nacional Autonoma de Mexico, Estacion Regional del*  
17 *Noroeste, Hermosillo, Sonora CP 83250 MX.* <sup>8</sup>*Department of Biology, San Diego State*  
18 *University, San Diego, CA 92182, USA.* <sup>9</sup>*Instituto Politecnico Nacional, CIIDIR, Sigma 119*  
19 *Fracc. 20 de Noviembre II, Durango, Dgo., 34234 MX.* <sup>10</sup>*USDA Forest Service, Dorena Genetic*  
20 *Resource Center, Cottage grove, OR, 97424, USA.* <sup>11</sup>*USDA Forest Service, Flagstaff, AZ86001,*  
21 *USA.* <sup>12</sup>*School of Forestry, Northern Arizona University, Flagstaff, AZ 86011, USA.* <sup>13</sup>*Programa*  
22 *Institucional de Doctorado en Ciencias Agropecuarias y Forestales, Universidad Juárez del*  
23 *Estado de Durango, 34120 Durango, MX.*

24

25 \*Authors for correspondence:

26 Mitra Menon,

27 1000 West Cary Street, Integrative Life Sciences, Virginia Commonwealth University,

28 Richmond, Virginia 23284 USA, E-mail: [menonm2@mymail.vcu.edu](mailto:menonm2@mymail.vcu.edu);

29 Andrew J. Eckert,

30 1000 West Cary Street, Life Science Bldg. - Department of Biology Rm 126, Virginia

31 Commonwealth University, Richmond, Virginia 23284 USA, E-mail: [aeckert2@vcu.edu](mailto:aeckert2@vcu.edu).

32 *Keywords:* conifers, ecological speciation, hybrid zone, introgression, population genomics,

33 extrinsic barriers

34 *Contents:* ~8 066 words (abstract, main text, acknowledgments, figure and table captions); 3

35 tables; 5 figures.

Menon *et al.*: Ecological speciation in pines

36 **Abstract** (234 words)

37

38 Interactions between extrinsic factors, such as disruptive selection, and intrinsic factors, such as

39 genetic incompatibilities among loci, can contribute to the maintenance of species boundaries.

40 The relative roles of these factors in the establishment of reproductive isolation can be examined

41 using species pairs characterized by gene flow throughout their divergence history. We

42 investigated the process of speciation and the maintenance of species boundaries between *Pinus*

43 *strobiformis* and *P. flexilis*. Utilizing ecological niche modeling, demographic modeling, and

44 genomic cline analyses, we illustrated a history of divergence with continuous gene flow

45 between these species. We found an abundance of advanced generation hybrids and a lack of loci

46 exhibiting large allele frequency differences across the hybrid zone. Additionally, we found

47 evidence for climate-associated variation in the hybrid index and niche divergence between

48 parental species and the hybrid zone. Our results are consistent with extrinsic factors, such as

49 climate, being an important isolating mechanism for these species. A buildup of intrinsic

50 incompatibilities and of co-adapted gene complexes is also apparent in our results, although

51 these appear to be in the earliest stages of development. This supports previous work in

52 coniferous species demonstrating the importance of extrinsic factors in creating and enforcing

53 species boundaries. Overall, we lend support to the hypothesis that varying strengths and

54 directions of selection pressures across the long lifespans of conifers, in combination with their

55 life history strategies, delay the evolution of strong intrinsic incompatibilities.

## Introduction

56  
57  
58       Speciation often occurs along a continuum of divergence such that evolutionary  
59 processes leading to species formation initially involve unrestricted gene flow followed by the  
60 evolution of reproductive isolation between lineages (Kane *et al.* 2009; Nosil & Feder 2012;  
61 Roesti *et al.* 2012). Hence, understanding how and when barriers to gene flow arise and are  
62 maintained along this continuum is a fundamental goal of evolutionary biology (Losos *et al.*  
63 2013). Under a model of ecological speciation (Schluter & Conte 2009), initiation of divergence  
64 among populations occurs through disruptive selection leading to the formation of ecotypes. This  
65 process results in shifts of allele frequencies correlated with environmental differences between  
66 habitats specific to each ecotype. The subsequent transition from ecotypes to reproductively  
67 isolated species occurs through the build-up of associations between several loci independently  
68 experiencing disruptive selection, and the action of selection to maintain these co-adapted  
69 divergent gene complexes (Flaxman *et al.* 2014).

70       Several studies of speciation have used hybrid zones as windows into the process of  
71 divergence among species (reviewed by Petit & Excoffier 2009). Studies conducted across the  
72 entire geographical range of hybridizing species have helped reveal not only the demographic  
73 context of speciation, but also the relative importance of intrinsic and extrinsic processes  
74 (Schield *et al.* 2017; Ryan *et al.* 2017). Specifically, the maintenance of species boundaries has  
75 been shown to occur through models of tension zones (intrinsic incompatibilities *sensu* Barton &  
76 Hewitt 1985; Via *et al.* 2000; Barton 2001; Rundle 2002) and bounded hybrid superiority  
77 (extrinsic incompatibilities *sensu* Moore 1977; Milne *et al.* 2003; Hamilton *et al.* 2013). The  
78 former facilitates divergence through a buildup of genetic incompatibilities among loci causing  
79 environmentally independent reduction in fitness of the hybrids, whereas the latter involves



Menon *et al.*: Ecological speciation in pines

80 increased hybrid fitness only in a novel environment to which the divergent parental allelic  
81 combinations confer a putative advantage. These two models are often coupled, such that  
82 genomic regions involved in intrinsic incompatibility coincide with loci exhibiting ecological  
83 gradients in allele frequency (Bierne *et al.* 2011; Cushman & Landguth 2016), ensuring the  
84 maintenance of species barriers under the homogenizing effect of gene flow (Kulmuni &  
85 Westram 2017). Thus, the interaction between intrinsic and extrinsic barriers to gene flow  
86 generates a genomic mosaic of introgression and differentiation that depends in part upon the  
87 demographic context and life history traits of the diverging lineages.

88         The recent influx of genomic data from non-model species has facilitated studies of  
89 ecological speciation across varying spatial and temporal scales (Lexer *et al.* 2010; Andrew &  
90 Rieseberg 2013; de Lafontaine *et al.* 2015; Lackey & Boughman 2016; Marques *et al.* 2017).  
91 Studies using genome scans often lend support to the genic view of speciation (Wu 2001), which  
92 predicts that a handful of genomic regions experiencing strong selection pressures will exhibit  
93 high differentiation against a background of lower differentiation driven by unrestricted gene  
94 flow. Varying levels of differentiation across loci thus generates a mosaic of genomic  
95 differentiation. Methodological approaches designed to detect the processes underlying this  
96 mosaic, however, are confounded by demographic histories of secondary contact, genomic areas  
97 of suppressed recombination, recent divergences without gene flow, allele surfing, and selective  
98 sweeps specific to each lineage unrelated to the development of reproductive isolation (Noor &  
99 Bennett 2009; Cruickshank & Hahn 2014). For example, ecological speciation could result in  
100 genomic regions of elevated differentiation (i.e. genomic islands of differentiation) that are  
101 associated with niche partitioning, but not necessarily with reproductive isolation. Further, these  
102 islands of differentiation are mostly expected when adaptation occurs from moderate- to large-

103 effect *de novo* mutations (Lackey & Boughman 2016). Genomic approaches used to identify  
104 islands of differentiation may thus be biased against identifying polygenic regions associated  
105 with species divergence, or towards identifying loci that contribute to ecological niche  
106 divergence of hybrids relative to both parental species and hence restrict gene flow between  
107 them. To avoid these biases, ecological niche divergence should be evaluated in the hybrid zone  
108 with respect to both parental species and correlated to patterns of hybrid ancestry (e.g. Hamilton  
109 *et al.* 2013).

110         Species of conifers are known to have ecologically differentiated niches despite the  
111 absence of strong morphological differences (e.g. Rehfeldt 1999). Strong pre- and post-zygotic  
112 isolating barriers contributing towards morphological disjunctions are often absent in conifers  
113 (Critchfield 1986; Buschiazzo *et al.* 2012; Pavy *et al.* 2012) due to their life history  
114 characteristics, such as longevity, high dispersal abilities, and long generation times (Petit &  
115 Hampe 2006; Neale & Kremer 2011). These contribute towards large effective population sizes,  
116 and moderate to high levels of genetic diversity, facilitating establishment across an array of  
117 ecological conditions. Ecological niche partitioning arising from extrinsic barriers is thus likely  
118 to play a dominant role in facilitating speciation within conifers (e.g. Hamilton *et al.* 2013).

119         In this study, we use an integrative approach to investigate processes leading to the  
120 divergence of two North American pine species – *Pinus strobiformis* Engelm. (southwestern  
121 white pine), and *P. flexilis* E. James. (limber pine). Our focal species inhabit a wide latitudinal  
122 range in the western part of North America, with a putative area of sympatry located in the  
123 southern Rocky Mountains and Colorado Plateau in which morphological evidence points  
124 towards the occurrence of hybridization (Steinhoff & Andresen 1971; Tomback & Achuff 2010).  
125 These species also display limited differences in morphological and reproductive traits

Menon *et al.*: Ecological speciation in pines

126 (Benkman *et al.* 1984; Tomback *et al.* 2011; Bisbee 2014) and show evidence of local adaptation  
127 to the heterogeneous climatic conditions across their geographical range and also within the area  
128 of putative hybridization (Steinhoff & Andresen 1971; Moreno-Letelier *et al.* 2013; Borgman *et*  
129 *al.* 2015; Moreno-Letelier & Barraclough 2015; Goodrich *et al.* 2016). To examine the processes  
130 influencing species boundaries between these two conifer species, we asked three questions: (1)  
131 Is there niche divergence among *P. strobiformis*, *P. flexilis* and the putative hybrid zone? (2) Did  
132 the divergence of *P. strobiformis* and *P. flexilis* occur with continual gene flow? (3) Does a  
133 genome-wide mosaic of differentiation characterize divergence between *P. strobiformis* and *P.*  
134 *flexilis*, and is this pattern attributed to extrinsic, intrinsic, or an interaction of both factors? Our  
135 results are consistent with ecological divergence occurring with continual gene flow among the  
136 focal species, with several lines of evidence supporting the strong influence of extrinsic factors  
137 in reinforcing species boundaries.

## 138 **Materials and Methods**

### 139 **Focal taxa and field sampling**

140 *Pinus strobiformis* and *P. flexilis* are closely related species of white pines that occur  
141 across broad temperature and precipitation gradients in the mountainous areas of western North  
142 America. The native range of *P. strobiformis* includes Mexico and the southwestern United  
143 States, and its distribution exhibits disjunctions across dry and wet boreal mixed forest  
144 ecosystems (Looney & Waring 2013; Fig. 1). *Pinus flexilis* occurs in mountainous regions from  
145 northern Arizona and northern New Mexico to Alberta, with a region of putative sympatry with  
146 *P. strobiformis* in the southern Rocky Mountains and Colorado Plateau (Fig. 1). Across this zone  
147 of putative sympatry, cone morphology and dispersal syndromes fall along a continuum of

148 divergence blending into the characteristics of populations in the allopatric zones of either  
149 species (Bisbee 2014).

150 We sampled 42 *P. strobiformis* populations encompassing a total of 376 trees (5-13  
151 trees/population) from its entire geographical range. For *P. flexilis*, a total of 13 populations were  
152 sampled, with eight populations sampled from the southern periphery of the geographical range  
153 and five sampled closer to the range center (Fig. 1). Across these thirteen populations, we  
154 sampled a total of 69 trees (4–10 trees/population). To help minimize relatedness, trees within  
155 the same site were sampled with a minimum spacing of 50 m (*P. strobiformis*) and 200 m (*P.*  
156 *flexilis*) from each other.

## 157 **Data generation**

### 158 *Occurrence data*

159 We assembled a comprehensive dataset of occurrences for ecological niche modeling  
160 (ENM) by supplementing our field site data with occurrence records downloaded from the  
161 Global Biodiversity Information Facility (GBIF) using functions from the DISMO package  
162 (Hijmans *et al.* 2017) available in the R environment (R Core Team 2017). Using a series of  
163 filtering steps to account for observation and sampling biases (Supporting Information, Appendix  
164 S1.A), we obtained a final dataset of 254 occurrence records for *P. strobiformis* and 420 for *P.*  
165 *flexilis*. Incorporating intraspecific genetic variation into ENMs can improve model fit and  
166 provide more robust predictions when projecting across time and space (Knowles *et al.* 2007;  
167 Ikeda *et al.* 2017). Thus, we divided presence locations within *P. strobiformis* into core  
168 (latitudinal range: 19–30.5° N) and northern periphery (latitudinal range: 31–33° N). These groups  
169 likely represent different genetic clusters given the geographically restricted hybridization  
170 between *P. flexilis* and *P. strobiformis* (Steinhoff & Andresen 1971; Tomback & Achuff 2010;

Menon *et al.*: Ecological speciation in pines

171 Bisbee 2014). We defined three groups that were the focus of our enquiries – (1) populations of  
172 *P. flexilis*, (2) populations of *P. strobiformis* from the northern range periphery (Periphery  
173 hereafter), and (3) populations of *P. strobiformis* from the range core (Core hereafter). Nineteen  
174 bioclimatic variables and altitude were used as predictors in the ENMs for all three groups.  
175 Present day geospatial data layers for these variables were downloaded from WorldClim v.1.4  
176 (Hijmans *et al.* 2005) at 30 arc-second resolutions and at 2.5 arc-minute resolutions for the Last  
177 Glacial Maximum (LGM) and data were extracted from each layer using the RASTER package  
178 (Hijmans *et al.* 2016) available in R.

#### 179 *DNA sequence data*

180 We extracted total genomic DNA from 445 individuals sampled across 55 populations of  
181 both species using DNeasy Plant Kits (Qiagen). Five ddRADseq libraries (Peterson *et al.* 2012),  
182 each containing up to 96 multiplexed samples, were prepared using the procedure detailed in  
183 Parchman *et al.* (2012). All libraries were digested using the *EcoRI* and *MseI* restriction  
184 enzymes followed by ligation of adaptors, barcodes, and primers. Following PCR, we selected  
185 DNA fragments in the 300–400 bp size range using agarose gel electrophoresis followed by  
186 isolation of pooled DNA from these gels using QIAquick Gel Extraction Kits (Qiagen). Single-  
187 end sequencing, with one multiplexed library per lane, was used to obtain 100bp reads, with all  
188 sequencing conducted with Illumina HiSeq 2500 at the Nucleic Acids Research Facility located  
189 at Virginia Commonwealth University. The resulting FASTQ files were processed using dDocent  
190 bioinformatics pipeline (details in Supporting Information, Appendix S1.B; Puritz *et al.* 2014).  
191 The entire process yielded a total of 51 633 single nucleotide polymorphisms (SNPs), which  
192 were used as the starting dataset for all subsequent analyses.

## 193 **Data analysis**

### 194 *Ecological niche modeling and niche divergence*

195         We developed ENMs for each of the three groups: Core, Periphery, and *P. flexilis*, using  
196 the algorithms available in Maximum Entropy (MAXENT; Phillips *et al.* 2006). Since MAXENT  
197 was specifically developed for presence-only data, we drew a one-degree rectangular buffer  
198 around the known distribution of both species and obtained 100 000 background points at  
199 random without duplicates in a cell. Data processing, model fitting, and model evaluation using  
200 5,000 iterations within MAXENT were conducted using the DISMO, RASTER, RGDAL (Bivand *et al.*  
201 2017), and SPTHIN (Aiello-Lammens *et al.* 2015) packages available in R. ENMs were  
202 constructed from climate variables with an absolute correlation coefficient ( $r$ ) less than 0.85.  
203 Two indices were used to assess model performance for each group: overall regularized training  
204 gain (RTG) and area under the curve (AUC). Since LGM data were not available at 30 arc-  
205 seconds resolution, we built two ENMs for each group (2.5 arc-minutes and 30 arc-seconds), but  
206 only used the 2.5 arc-minutes models for hindcasting to infer historical patterns of sympatry  
207 between species that could facilitate gene flow. We followed an average projection ensemble  
208 approach across three LGM scenarios (CCSM4, MIROC & MPI) to obtain a hindcasted  
209 suitability map. Changes in habitat suitability (stability) were assessed by adding MAXENT-  
210 predicted suitability maps across the LGM and present (as in Ortego *et al.* 2015). For these maps,  
211 values closer to 2 in a gridded cell are associated with the stability of highly suitable habitat for a  
212 given group across time points. In contrast, values closer to 0 are associated with the stability of  
213 highly unsuitable habitat for a given group across time points. Suitability scores obtained across  
214 the full geographical extent for the present conditions at 30 arc-seconds were compared across all  
215 three pairs of groups (Core–Periphery, Core–*P. flexilis*, Periphery–*P. flexilis*) to investigate

Menon *et al.*: Ecological speciation in pines

216 patterns of niche evolution. To account for potential biases towards niche divergence introduced  
217 by latitudinally associated environmental variation in the present range of each pair, we  
218 performed an asymmetric background randomization test, based on Schoener's  $D$ , in the R  
219 package ENMTOOLS (Warren *et al.* 2008). The two resulting null distributions of niche  
220 divergence obtained through this test correspond to the background of each group compared  
221 against the other. An observed value of Schoener's  $D$  much smaller than expected after  
222 accounting for background differences is indicative of niche divergence, whereas a value much  
223 larger than expected indicates niche conservatism (Warren *et al.* 2008).

#### 224 *Population structure and demographic modeling*

225 We assessed the pattern and the extent of genetic divergence between *P. strobiformis* and  
226 *P. flexilis* using multiple methods. First, we grouped the 42 *P. strobiformis* populations into the  
227 same core and periphery groups discussed above (see Data Generation & Fig. 1). We conducted  
228 principal components analysis (PCA) to visualize grouping of sampled trees into the three groups  
229 delineated in our methods (Patterson *et al.* 2006; McVean 2009). To complement the PCA, we  
230 also conducted an individual-based assignment test using FASTSTRUCTURE, a variational  
231 Bayesian version of STRUCTURE designed for use with large SNP datasets (Raj *et al.* 2014).  
232 For any given number of predefined clusters ( $K$ ), FASTSTRUCTURE assigns a  $Q$ -value  
233 representing the proportion of a sample's ancestry derived from each cluster. We set  $K$  to 2,  
234 representing the two parental species investigated here, as we were interested in admixture  
235 between two defined species and not the potential number of groups within our genetic data.  
236 Lastly, we utilized hierarchical fixation indices ( $F$ -statistics) to assess the extent of  
237 differentiation between species by nesting trees into populations and populations into species.  
238 There are two levels within the hierarchy, with  $F_{CT}$  describing differentiation among groups at

239 the highest level of the hierarchy and  $F_{ST}$  describing differentiation among groups across all  
240 levels of the hierarchy (see Yang 1998). A similar nested model with the highest level of  
241 hierarchy being groups within *P. strobiformis* was used to assess intraspecific differentiation. For  
242 the former,  $F$ -statistics are denoted using the term ‘species’ in the subscripts, whereas the latter  
243 uses the term ‘groups’ in the subscripts. We used a similar hierarchical model with variance  
244 partitioning to estimate group specific and pairwise  $F$ -statistics for the three groups delineated in  
245 this study. We denote pairwise values of  $F_{ST}$  using one-letter abbreviations for the groups being  
246 compared (e.g.  $F_{ST-CP}$  indicates  $F_{ST}$  between Core and Periphery), and group specific values of  
247  $F_{ST}$  with the name of the group in subscripts. We constructed 95% confidence intervals of  
248 multilocus  $F$ -statistics using bootstrap resampling ( $n = 100$  replicates) in the HIERFSTAT package  
249 (Goudet 2005) available in R. Along with estimation of  $F$ -statistics, we also assessed overall  
250 levels of genetic diversity using multilocus estimates (i.e. means across SNPs) of observed and  
251 expected heterozygosities ( $H_o$  and  $H_e$ ) per population.

252        Presence of individuals with mixed ancestry, as identified using FASTSTRUCTURE, can  
253 be a result of secondary contact, recent divergence causing incomplete lineage sorting, or the  
254 presence of gene flow throughout the divergence history. Disentangling these explanations is  
255 important, because it directly influences our understanding of the relative importance of intrinsic  
256 and extrinsic factors in facilitating speciation. For instance, when speciation is recent or has  
257 occurred with gene flow, we expect a heterogeneous landscape of genomic differentiation, such  
258 that while most of the genome is freely introgressed between species, only a few genomic  
259 regions associated with intrinsic or extrinsic factors inhibiting gene flow will exhibit elevated  
260 differentiation (Wu 2001; Feder *et al.* 2012). However, if hybrids are formed in areas with novel  
261 habitats, introgression might be selectively advantageous, such that heterozygotes at climate-



Menon *et al.*: Ecological speciation in pines

262 associated loci will confer higher fitness, and will lack elevated islands of differentiation. To  
263 infer the timing and influence of various demographic processes shaping the divergence history  
264 of our focal groups, we conducted demographic modeling using Diffusion Approximation for  
265 Demographic Inference ( $\partial A \partial I$ ; Gutenkunst *et al.* 2009). We down-sampled the total SNP dataset  
266 for computational simplicity based on population genetic summary statistics and then randomly  
267 sampled one SNP per assembled contig to obtain a final dataset of 4,800 SNPs that were used in  
268 subsequent  $\partial A \partial I$  analyses (Supporting Information, Appendix S1.C).

269 We compared a model of pure divergence with no gene flow ( $M_1$ ) against a set of 10  
270 alternative demographic models ( $M_2$ – $M_7$ ) representing different speciation scenarios including  
271 varying timing and directionality of ancient or contemporary gene flow (Supporting Information,  
272 Fig. S1). Complexity was added to the models with gene flow by incorporating heterogeneity in  
273 the gene flow parameter across loci (Tine *et al.* 2014, models  $M_8$ – $M_{11}$ , Fig. S1). We ran 10  
274 replicate runs of each model in  $\partial A \partial I$ , using a  $200 \times 220 \times 240$  grid space and the nonlinear  
275 Broyden-Fletcher-Goldfarb-Shannon (BFGS) optimization routine. Following Carstens *et al.*  
276 (2013), we conducted model selection in an information-theoretic framework using Akaike  
277 information criterion (AIC; Akaike 1974) and  $\Delta AIC$  ( $AIC_{\text{model } i} - AIC_{\text{best model}}$ ) scores (Burnham  
278 & Anderson 2002), calculated using results from the best replicate run (highest composite  
279 likelihood) for each model. Unscaled parameter estimates were obtained using a per-site  
280 substitution rate of  $7.28 \times 10^{-10}$  substitutions/site/year rate estimated for Pinaceae by De La  
281 Torre *et al.* (2017) and a generation time of 50 years.

282 *Genomics of interspecific introgression*

283 Analyses of clines across hybrid zones are widely used to identify loci exhibiting  
284 exceptional patterns of introgression relative to the average genomic background (Fitzpatrick

285 2013; Gompert *et al.* 2012a; Gompert & Buerkle 2011; Stankowskiet *al.* 2015). We classified our  
286 sampled trees into categories corresponding to admixed ( $n_A = 111$ ) and parental species (*P.*  
287 *strobiformis* = 277, *P. flexilis* = 54) based on the  $Q$ -values from FASTSTRUCTURE. Trees with  
288  $Q$ -values of 0.9 or higher were classified as pure *P. strobiformis*, those with  $Q$  of 0.1 or lower  
289 were classified as pure *P. flexilis*, and those with intermediate  $Q$ -values were classified as  
290 admixed (e.g. Ortego *et al.* 2014). As most loci exhibited little to no differentiation between  
291 parental species, we retained only loci with a minor allele frequency (MAF) difference of at least  
292 10% between parental species ( $n = 4,857$  SNPs). This allowed us to avoid false correlations  
293 between cline parameters and fixation indices (Parchman *et al.* 2013). We used this subset of  
294 4,857 SNPs to perform a Bayesian genomic cline analysis in BGC v1.0 (Gompert & Buerkle  
295 2012; Gompert & Buerkle 2011). Using Markov chain Monte Carlo (MCMC) sampling, BGC  
296 estimates the posterior distribution of ancestry for each locus as a function of the genome-wide  
297 admixture coefficient. The BGC model includes two genomic cline parameters,  $\alpha$  (genomic cline  
298 center) and  $\beta$  (genomic cline rate, i.e. slope), determining the probability of *P. flexilis* ancestry,  
299 and the rate of transition from *P. flexilis* to *P. strobiformis* given a level of genomic admixture  
300 described by the hybrid index,  $h$ , respectively (Gompert & Buerkle 2012; Gompert *et al.* 2012a).  
301 A tree with  $h = 0$  was classified as having solely *P. strobiformis* ancestry, whereas a tree with  $h =$   
302 1 was classified as having solely *P. flexilis* ancestry. We ran BGC for five replicate runs, each 45  
303 000 steps in length, and, after discarding the first 25 000 steps as burn-in, we thinned the  
304 posterior distribution every 20 steps, thus yielding 1,000 samples which were used for inference  
305 of model parameters. We used TRACER v1.6 (Rambaut *et al.* 2013) to test for convergence  
306 among replicated runs, as well as appropriate mixing along MCMC chains. We identified loci  
307 with excess ancestry (relative to the genome-wide average) as those with posterior  $\alpha$  or  $\beta$

Menon *et al.*: Ecological speciation in pines

308 credible intervals (CI; 95% equal-tail intervals) not containing zero. Moreover, we identified  
309 outlier loci as those with posterior mean point estimates of  $\alpha$  ( $\hat{\alpha}$ ) or  $\beta$  ( $\hat{\beta}$ ) significantly different  
310 from the rest of the genome, as judged by comparison to posterior quantiles of random-effect  
311 priors for  $\alpha$  and  $\beta$  (Gompert *et al.* 2012a). Several empirical and simulation based studies have  
312 demonstrated that both  $\alpha$  and  $\beta$  can reflect patterns of selection in the hybrid zone (Gompert et  
313 al. 2012b; Janoušek *et al.* 2012), but the interpretation of these values is influenced by the  
314 underlying demographic scenario (Gompert & Buerkle 2012; Gompert *et al.* 2012a,2012b).  
315 Besides categorizing loci, we also tested for correlations among locus-specific  $F_{CT-species}$ ,  $\alpha$ , and  
316  $\beta$ , with and without absolute values for  $\alpha$  and  $\beta$ . The sign of the cline parameters (specifically  
317  $\beta$ ) have direct implications for inferring the processes maintaining species boundaries and hence  
318 were incorporated in correlation tests. Specifically, extremely positive values of  $\beta$  reflect strong  
319 selection against hybrids or population structure in the hybrid zone (Gompert *et al.* 2012b), while  
320 extremely negative values of  $\beta$  indicate a wide cline representing easy dispersal across species  
321 boundaries (Janoušek *et al.* 2012).

322         Although the hybrid index ( $h$ ) obtained from BGC provides information about the age and  
323 stability of a hybrid zone, such inferences are limited to only one generation of admixture  
324 (Fitzpatrick 2012). We estimated  $h$  and interspecific heterozygosity using INTROGRESS  
325 (Gompert & Buerkle 2010), in order to extend our interpretations to a historical hybrid zone and  
326 categorize individuals into recent (F1s), advanced generation (FNs), and backcrossed hybrids  
327 (BC). This was done using a modified classification from Hamilton *et al.* (2013). Both BGC and  
328 INTROGRESS yielded very similar estimates of  $h$  (Pearson's  $r = 0.7$ ,  $p = 0.00042$ ), thus we used  
329 estimates from INTROGRESS due to the availability of inter-specific heterozygosity estimates

330 from this software. To test for the influence of exogenous factors in the maintenance of species  
331 boundaries we performed linear regression analyses with backward variable selection using  $h$   
332 against climate and geography as predictor variables.

## 333 **Results**

### 334 **Ecological niche modeling and niche divergence**

335 ENMs for each of the three groups used in this study (Fig. 1) had high predictive ability,  
336 as indicated by AUC and RTG values (Table 1). For Core and Periphery, several covariates  
337 stood out as important with precipitation seasonality (Bio15) being shared between Core and  
338 Periphery; however, altitude was consistently the most important variable for *P. flexilis* across  
339 different measures of variable importance (Table 1). Hindcasting the 2.5 arc-minute model onto  
340 LGM data layers supported a recent, post-LGM niche fragmentation and northward expansion in  
341 Periphery (Supporting Information Fig. S2). A similar post-LGM northward expansion of  
342 suitable niche space was observed for *P. flexilis*. Furthermore, there was extensive range overlap  
343 between the two species during the LGM, which was greater than what is currently observed  
344 (Supporting Information Fig. S2). The values of niche similarity based on Schoener's  $D$  ranged  
345 from 0.05 (*P. flexilis*–Core) to 0.17 (Periphery – Core). Background randomization tests revealed  
346 statistically significant niche divergence for two of the three comparisons (Fig. 2). Specifically,  
347 there was asymmetrical niche divergence between Core and Periphery, with the niche of  
348 periphery being conserved relative to the background of core. A similar pattern was noted using  
349 only the presence points, where each group formed a distinct cluster within the multivariate  
350 climate space defined by the top two principal components (PCs) derived from PCA on the  
351 climate variables used for construction of the ENMs (Supporting information, Fig. S3.A).

### 352 **Population structure and divergence history**

Menon *et al.*: Ecological speciation in pines

353           The PCA using 51 633 SNPs was consistent with trees sampled from Core being  
354 differentiated from those of *P. flexilis*, which was most marked along PC1 (Fig. 3A). This PC  
355 explained 0.9% of the total genetic variance, which was in line with the overall level of  
356 differentiation estimated using hierarchical  $F$ -statistics ( $F_{ST\text{-species}} = 0.021$ , 95% CI: 0.008–0.031).  
357 Trees sampled from Periphery were located between those sampled from Core and *P. flexilis*  
358 (Fig. 3A), in line with peripheral populations containing hybrids between the two parental  
359 species. There was also a latitudinal gradient in the mean population  $Q$ -values, as estimated  
360 using FASTSTRUCTURE, with Core populations exhibiting little to no ancestry from *P. flexilis*  
361 and Periphery being a mixture of *P. flexilis* and Core (Fig. 3B). At the individual tree level, we  
362 observed a strong negative correlation (Pearson's  $r = -0.69$ ,  $p = 4.087e-07$ ) between  $Q$ -values of  
363 putative hybrids and latitude, which is consistent with a geographical gradient of genomic  
364 introgression where trees geographically proximal to either parental species contain more  
365 ancestry from that parental species. Multilocus estimation of differentiation between species  
366 ( $F_{CT\text{-species}}$ ) was 0.01 (95% CI: 0.005–0.018, Fig. 5A), while that between groups within *P.*  
367 *strobiformis* ( $F_{CT\text{-groups}}$ ) was 0.003 (95% CI: 0.0007–0.006). Multilocus  $F_{ST}$  within each group,  
368 pairwise  $F_{ST}$  between each pair of group, and heterozygosities differed little among the three  
369 groups, with the Core–*P. flexilis* comparison having the highest pairwise  $F_{ST\text{-CF}} = 0.019$  (Table  
370 2). Although populations of Periphery exhibited slightly higher heterozygosities and  $F_{ST}$  values  
371 ( $F_{ST\text{-periphery}}$ ), this pattern was mainly driven by few populations, as indicated by the wider  
372 confidence interval around these estimates (Table 2).

373           The best-supported demographic model was  $M_4$ , which is a model of symmetric ancient  
374 gene flow between ancestral *P. strobiformis* and *P. flexilis* lineages, followed by contemporary  
375 gene flow between Periphery and *P. flexilis* (Table 3; Fig 4). This model was supported by a

376 distinct minimum AIC score that was better than that of all other  $\hat{\Delta AIC}_i$  models by a margin of  
377 44.8 information units ( $\Delta AIC_i = 44.8$  or greater). The next best model,  $M_8$ , was similar to that  
378 of  $M_4$ , but without contemporary gene flow between *P. strobiformis* and *P. flexilis*, and a  
379 heterogeneous ancient gene flow between ancestral populations of the two parental  
380 species. Converted parameter estimates indicated that the species diverged 11.36 million years  
381 ago (Ma) in the Miocene, but that groups within *P. strobiformis* diverged 2.29 Ma during early  
382 Pleistocene (Fig. 4). Overall rates of gene flow between species were substantial for both  
383 historical and contemporary periods, however the contemporary gene flow between species was  
384 geographically restricted Periphery (Supporting Information Table S2). In addition, *P. flexilis*  
385 and Periphery experienced asymmetrical gene flow, which was larger in the direction of *P.*  
386 *flexilis* to Periphery ( $M_{PF} = 8.81$  migrants/generation versus  $M_{FP} = 4.35$ ). Periphery had the  
387 largest population size estimate, while *P. flexilis* was inferred to have experienced a reduction in  
388 population size through time.

### 389 **Genomics of interspecific introgression**

390 Values of  $h$  ranged from near zero to 0.80, with values around 0.20 being the most  
391 common thus suggesting overrepresentation of *P. strobiformis* ancestry (Fig. 5B). Estimates of  
392 interspecific heterozygosity had a narrow range from 0.45 to 0.64, indicating weak reproductive  
393 barriers (Hamilton *et al.* 2013) and a long history of recombination within the hybrid zone  
394 (Gompert *et al.* 2014). Classification of trees into genotypic classes based on  $h$  and interspecific  
395 heterozygosity revealed a dominance of advanced-generation hybrids (54%), with some trees  
396 being backcrossed into *P. strobiformis* (22%), but no recent hybrids (F1s) were apparent.  
397 Stepwise linear regression analysis revealed a significant effect of geography and climate on  $h$   
398 across the putative hybrid zone. Latitude (Pearson's  $r = 0.41$ ,  $p = 4.087e-07$ ), precipitation

Menon *et al.*: Ecological speciation in pines

399 seasonality (Pearson's  $r = -0.32$ ,  $p = 0.006$ ), and mean temperature of the warmest quarter  
400 (Pearson's  $r = -0.18$ ,  $p = 0.005$ ) had a strong influence on  $h$ , in line with the latter two being  
401 important predictor variables for Periphery in our ENM.

402         The influence of selection is reflected in both  $\alpha$  and  $\beta$ ; however, exceptional values of  $\alpha$   
403 are more indicative of selection favoring directional introgression, while extreme  $\beta$  values reflect  
404 strong selection against hybrids or presence of population structure within the hybrid zone  
405 (Gompert *et al.* 2011). Substantial variation was found in estimates of genomic cline parameters  
406 (Fig. 5D,C), especially for  $\alpha$ , with its range ( $-0.99$  to  $1.72$ ) being 18.5-fold as wide as that of the  
407 range for  $\beta$  ( $-0.068$  to  $0.078$ ). Similar to the patterns observed in the distribution of  $h$ , an  
408 asymmetry towards *P. strobiformis* ancestry was noted in the genomic cline estimates. From the  
409 posterior distribution of  $\alpha$ , we found 3,193 outlier loci, of which 570 (17.9%) had elevated  
410 probabilities of *P. flexilis* ancestry (positive  $\hat{\alpha}$ ), and 2,623 (82.1%) had elevated probabilities of  
411 *P. strobiformis* ancestry (negative  $\hat{\alpha}$ ). We identified fewer loci with excess ancestry, but in  
412 contrast to the pattern for outlier loci those with excess ancestry favored *P. flexilis* over *P.*  
413 *strobiformis* ancestry. Among the 287 loci with excess ancestry, 204 (71.1%) had excess *P.*  
414 *flexilis* ancestry (i.e. lower 95% CI of  $\alpha > 0$ ) and 83 (28.9%) had excess *P. strobiformis* ancestry  
415 (i.e. upper 95% CI of  $\alpha < 0$ ). The multilocus  $F_{CT\text{-species}}$  estimate for loci with excess ancestry was  
416 0.12 (95% CI: 0.09–0.13) while for outlier loci it was 0.058 (95% CI: 0.05–0.09). We did not  
417 identify any loci that were  $\beta$  outliers or had excess ancestry indicated by  $\beta$ . Hierarchical  $F_{CT\text{-species}}$   
418 between species was negatively correlated with raw values of  $\alpha$  (Pearson's  $r = -0.036$ ,  $p = 0.01$ ),  
419 positively with raw values of  $\beta$  (Pearson's  $r = 0.048$ ,  $p = 0.0007$ ) and positively with absolute  
420 values of both  $\alpha$  (Pearson's  $r = 0.14$ ,  $p = 2.2e-16$ ) and  $\beta$  (Pearson's  $r = 0.26$ ,  $p = 2.2e-16$ ) (Fig.  
421 5E).



422

## Discussion

423           We identified strong evidence supporting ecological divergence between *P. strobiformis*  
424 and *P. flexilis* despite extensive gene flow. Our findings are generally consistent with previous  
425 reports on the species examined here; however, in contrast to the recent divergence time  
426 estimates arrived at using chloroplast and mitochondrial loci (Moreno-Letelier *et al.* 2013), our  
427 demographic modeling results reject a hypothesis of extremely recent divergence between the  
428 two species. Instead, we support a model of ongoing speciation with gene flow that is driven and  
429 maintained primarily by extrinsic factors.

### 430 **Niche evolution and ecological divergence**

431           Our results indicate that climatic factors have played a major role in driving niche  
432 divergence between *P. strobiformis* and *P. flexilis*. Populations within Periphery coincide with  
433 the known hybrid zone between *P. strobiformis* and *P. flexilis* (Steinhoff & Andresen 1971;  
434 Tomback & Achuff 2010; Bisbee 2014) and formed a distinct group characterized by niche  
435 divergence from *P. flexilis* and asymmetrical niche divergence from Core. The asymmetrical  
436 pattern of niche divergence between Core and Periphery is likely a result of recent divergence.  
437 Under this scenario, we expect that niche differentiation would occur primarily along a few  
438 environmental variables that strongly influence fitness in the transitional environmental  
439 conditions, with little to no differentiation among groups on the other environmental axes. For  
440 example, precipitation seasonality was an important niche predictor for both Core and Periphery,  
441 although they were differentiated along this environmental axis (Supporting information, Fig.  
442 S3.B). This pattern reiterates the presence of hybrid populations in transitional environmental  
443 conditions and experiencing early stages of niche divergence from both parents.



Menon *et al.*: Ecological speciation in pines

444 In line with these results, precipitation seasonality and mean temperature of warmest  
445 quarter had a strong negative association with genomic ancestry and contributed to the niche  
446 divergence of Periphery. These two climatic variables influence plant evapotranspiration and  
447 thus affect drought responses (Mishra & Singh 2010). Drought stress during the active growing  
448 season is widely recognized as a limiting factor to plant growth in the western parts of North  
449 America (Williams *et al.* 2010; Restaino *et al.* 2016) and our results are indicative of adaptive  
450 divergence along a drought tolerance gradient between the three groups (Gitlin *et al.* 2006; Allen  
451 & Breshears 1998). Further, our study broadly agrees with other reports in *P. strobiformis*  
452 indicating precipitation and altitude to be some key niche predictors (Aguirre-Gutiérrez *et al.*  
453 2015; Shirk *et al.* 2017). Climatic clines of admixture and environmentally-dependent  
454 maintenance of hybrid zones have been noted in other species of woody perennials in the genera  
455 *Quercus* (Dodd & Afzal-Rafii 2004), *Picea* (Hamilton *et al.* 2013; De La Torre *et al.* 2014b),  
456 *Rhododendron* (Milne *et al.* 2003), and *Pinus* (Cullingham *et al.* 2014). An important variable  
457 unaccounted for in our study, however, is white pine blister rust infestation (*Cronartium ribicola*  
458 Fisch J.C), which influences stand dynamics of both species (Looney & Waring 2013) and drives  
459 trade-offs between drought-tolerance and resistance in *P. flexilis* (Vogan & Schoettle 2015) .  
460 However, given the low and recent incidence of infestation (Looney *et al.* 2015), it is unlikely  
461 that *C. ribicola* contributed towards niche divergence of the focal taxa. It is more likely that  
462 under projected scenarios of environmental change, interactions between these selective forces  
463 may occur in the future to influence ongoing speciation dynamics.

464 Despite fluctuations in suitable range size (Supporting information, Fig. S2) and previous  
465 studies indicating reduction in genetic diversity at range margins using chloroplast markers  
466 (Moreno-Letelier & Piñero 2009), we find no evidence for this in our study. This might be

467 explained by the asymmetry in gene flow between Periphery and *P. flexilis*, as inferred from our  
468 demographic modeling results (Bridle & Vines 2007; Ortego *et al.* 2014). Moreover, evidence of  
469 directional introgression from *P. flexilis* (positive  $\alpha$  outliers) might also have facilitated  
470 adaptation to transitional environmental conditions. Such novel allelic combinations have often  
471 contributed to the ability of populations to colonize new niches that are intermediate to the  
472 climatic conditions experienced by the parental species (De Carvalho *et al.* 2010; Hamilton *et al.*  
473 2013; De La Torre *et al.* 2014b; Geraldès *et al.* 2014). Presence of a locally adapted and  
474 historical hybrid zone is supported by the absence of  $\beta$  outliers in our genomic cline results  
475 (Kamdem *et al.* 2016) and a recent study uncovering high  $Q_{ST}$  values associated with  
476 physiological traits primarily linked to drought tolerance within the group Periphery (Goodrich *et al.*  
477 2016). The geographic cline in  $h$ , asymmetry in excess ancestry loci towards *P. flexilis*, and  
478 elevated estimates of  $F_{ST-periphery}$ , however, indicate the potential for geographically driven  
479 neutral introgression to generate biased signals of local adaptation within the peripheral  
480 populations (Geraldès *et al.* 2014). Ongoing investigations using replicate populations in the  
481 hybrid zone across gradients of geographic proximity and climate similarity will be able to  
482 address this issue in further detail (Lotterhos & Whitlock 2015; Riquet *et al.* 2017).

### 483 **Speciation with gene flow without islands of divergence**

484 Demographic modeling indicated that divergence of *P. strobiformis* and *P. flexilis* is not  
485 recent (~11 Ma) on an absolute time scale and has occurred with continuous gene flow. The  
486 presence of continual gene flow and absence of a period of allopatry, moreover, is also supported  
487 by the L-shaped distribution of  $F_{CT-species}$  values (Fig. 5A. Nosil & Feder 2012). Reduction in  
488 overlapping niche suitability from LGM to present, between *P. strobiformis* and *P. flexilis*,  
489 agrees with the best-supported demographic model indicating continuous and geographically

Menon *et al.*: Ecological speciation in pines

490 restricted contemporary gene flow (also see Moreno-Letelier & Piñero 2009). Contemporary  
491 reduction in  $N_e$  for *P. flexilis* from our demographic modeling is contrary to the predicted post-  
492 LGM expansion of suitable habitat. This is likely due to the limited geographical sampling  
493 within *P. flexilis* for our genomic analyses, the two modeling approaches estimating population  
494 sizes across very different temporal scales, and a nonlinear relationship between habitat  
495 suitability and realized population sizes. Despite the potential for islands of divergence under a  
496 model of speciation with gene flow (Nosil 2008; Feder *et al.* 2012; Tine *et al.* 2014), as well as  
497 niche divergence results consistent with ecological speciation with gene flow between *P.*  
498 *strobiformis* and *P. flexilis*, the best-supported demographic model herein did not provide  
499 evidence for islands of divergence.

500         The absence of elevated islands of divergence in this study, however, does not  
501 necessarily indicate an absence of adaptive divergence during speciation with gene flow. The  
502 lack of islands of divergence is expected in conifers, given the prevalence of polygenic  
503 architectures defining continuous trait variation across species boundaries and the expected  
504 prevalence of soft sweeps (Pritchard & Rienzo 2010; Alberto *et al.* 2013; Rajora *et al.* 2016;  
505 Lind *et al.* 2017). Alternatively, given the large and complex genomes of conifers (reviewed by  
506 De La Torre *et al.* 2014a) our ddRADseq markers underrepresented genic regions, which are  
507 often identified as islands of divergence (Nosil & Feder 2012; Zhou *et al.* 2014; Moreno-Letelier  
508 & Barraclough 2015; Marques *et al.* 2017). For example, Moreno-Letelier & Barraclough (2015)  
509 demonstrated the potential for islands of divergence at drought-associated genes, which had a  
510 high average  $F_{ST}$  value of 0.33 (0.09–0.4) compared to the genome-wide estimate from this study  
511 ( $F_{ST-species} = 0.02$ ). Future investigations using candidate gene approaches or exome capture

512 might thus be able to identify islands of divergence in conifers, although evidence of adaptation  
513 in complex genomes often also appears within intergenic regions (Li *et al.* 2012).

#### 514 **Genomic mosaic of introgression**

515 The spatial context of loci within genomes, as well as the temporal scale of divergence  
516 between lineages, can influence patterns of introgression and are often depicted by a mosaic  
517 landscape of genomic differentiation and ancestry. For instance, Coyne & Orr (1989), Noor &  
518 Bennett (2009), and Christe *et al.* (2017) have all argued that islands of divergence tend to  
519 accumulate around regions of reduced recombination such as centromeres and inversions.  
520 Extrinsic factors, such as disruptive selection can also restrict gene flow, but under the observed  
521 demographic scenario these alone are unlikely to generate islands of divergence (Yeaman & Otto  
522 2011; Yeaman *et al.* 2016). However, extrinsic barriers can often result in the evolution of  
523 intrinsic barriers and subsequently become coupled with intrinsic barriers and with several other  
524 loci experiencing similar selection pressures (Agrawal *et al.* 2011; Flaxman *et al.* 2014). Thus,  
525 given sufficient time, even under a model of speciation with gene flow, such coupling effects  
526 will ensure the maintenance of species boundaries relative to the action of either factor alone  
527 (Barton & De Cara 2009). Specifically, in our focal species, previous work using candidate  
528 genes for drought stress provides evidence for divergent selection driving speciation, despite low  
529 genome-wide levels of differentiation (Moreno-Letelier & Barraclough 2015). Although a  
530 thorough examination of exome-wide variation remains to be done, the correlation of  $h$  with  
531 drought related variables when coupled with the work of Moreno-Letelier & Barraclough (2015)  
532 implies that adaptive responses to drought stress likely contributed to the origin and maintenance  
533 of species boundaries in this system.

Menon *et al.*: Ecological speciation in pines

534           A positive correlation between the steepness of genomic clines ( $\beta$ ) and  $F_{CT}$  points  
535 towards coincidence of loci involved in disruptive selection and those involved in reproductive  
536 isolation. Such a positive association has been demonstrated across several taxa (*cf.* Janoušek *et*  
537 *al.* 2012; Parchman *et al.* 2013; Gompert *et al.* 2014; Ryan *et al.* 2017) and we suggest it to be  
538 indicative of disruptive selection driving the evolution of intrinsic barriers and its coupling with  
539 extrinsic processes. Under the demographic scenario of ongoing gene flow, signatures of  
540 selection against hybrids (i.e., underdominance) would be reflected by steep genomic clines  
541 (positive  $\beta$ ), while selection for hybrids (i.e., overdominance) would be reflected by wide  
542 genomic clines (negative  $\beta$ ; Gompert & Buerkle 2011; Janoušek *et al.* 2012). The observed  
543 absence of positive  $\beta$  outliers and of islands of divergence in our demographic analysis indicates  
544 that despite some evidence of coupling between intrinsic and extrinsic barriers, widespread  
545 intrinsic incompatibilities are absent in this system, at least for the loci examined in this study.  
546 This is consistent with known patterns of forced crosses for these and other white pine species  
547 (Critchfield 1986). The limited evidence of intrinsic incompatibilities noted in our study could be  
548 generalized across conifers with similar divergence history, owing to their life history strategies  
549 such as long generation time and high dispersal capacity, which will restrict the evolution of  
550 post- and pre-zygotic isolating mechanism (Stacy *et al.* 2017). Absence of negative  $\beta$  outliers and  
551 of recent hybrids indicates widespread recombination within the hybrid zone and an intermediate  
552 stage of divergence between our focal species (Nosil *et al.* 2009). The intermediate stage of  
553 divergence between our focal species, despite a long period of divergence in absolute time (i.e.  
554 years), is not surprising given the long generation times and large  $N_e$  estimates for conifers,  
555 which would have reduced the realized period of divergence when measured in coalescent units.  
556 Overall, the total absence of  $\beta$  outliers indicates a viable hybrid zone maintained largely through

557 extrinsic factors (Kamdem *et al.* 2016), which may be the first stage of coupling between  
558 intrinsic and extrinsic barriers.

559         Contrary to the absence of  $\beta$  outliers, we identified many  $\alpha$  outliers which is reflective of  
560 a hybrid zone experiencing moderate selection pressure and high levels of gene flow from the  
561 parental species (Gompert & Buerkle 2011). Limited variation in  $\beta$  is associated with a diffuse  
562 genomic architecture of isolation (Gompert *et al.* 2012b), whereas the high genomic  
563 heterogeneity in  $\alpha$ , under the estimated demographic scenario, could imply divergent natural  
564 selection operating within the hybrid zone (Gompert & Buerkle 2011). This agrees with the  
565 higher values of multilocus  $F_{ST}$  within the putative hybrid zone ( $F_{ST\text{-periphery}}$ ) and previous  
566 evidence of local adaptation in this region (Goodrich *et al.* 2016). A similar genomic mosaic of  
567 introgression has been noted across several studies (Lexer *et al.* 2010; Parchman *et al.* 2013;  
568 Gompert *et al.* 2014; Lindtke *et al.* 2014; de Lafontaine *et al.* 2015) and is likely a result of  
569 complex interactions between divergence history, selection, and genomic features.

570         Evidence of higher number of outliers from *P. strobiformis* and a negative association  
571 between our cline parameters ( $\alpha$  and  $\beta$ ) could be explained by three processes: (i) intrinsic  
572 incompatibilities resulting from Dobzhansky–Muller effects or more complex epistatic effects  
573 disproportionally favoring allelic combinations from *P. strobiformis* in the hybrids relative to *P.*  
574 *flexilis* parental background, (ii) widespread directional selection on alleles from *P. strobiformis*  
575 in the hybrid zone leading to the formation of co-adapted gene complexes, and (iii) incomplete  
576 lineage sorting resulting from recent divergence between Core and Periphery. In contrast to  
577 inferences from the Engelmann–white spruce hybrid zone (De La Torre *et al.* 2014b), the  
578 asymmetry of outlier loci is not due to high rates of gene flow from Core into Periphery, as the  
579 best demographic model excluded gene flow between these groups (see Figure 5B). A higher

Menon *et al.*: Ecological speciation in pines

580 number of outlier loci with introgression favoring *P. strobiformis* is consistent with the strong  
581 influence of selection favoring alleles with *P. strobiformis* ancestry in the hybrid zone. Even  
582 without a linkage map, the cline results, along with precipitation seasonality being a strong  
583 shared niche predictor for Core and Periphery, points towards widespread directional  
584 introgression from *P. strobiformis* into the hybrid zone, which is consistent with local adaptation  
585 driving the evolution of co-adapted gene complexes from *P. strobiformis* and of emerging  
586 intrinsic incompatibilities (Gompert *et al.* 2012b). The geographic clines of *h*, despite the  
587 absence of current gene flow between the Core and Periphery, also points towards an effect of  
588 incomplete lineage sorting. However, higher directional introgression from *P. strobiformis* even  
589 after accounting for the skewed pattern of genomic ancestry in the hybrid individuals emphasizes  
590 the role of selection over incomplete lineage sorting. Further, directional introgression of alleles  
591 from Core into Periphery might also have led to the asymmetrical niche divergence between  
592 these groups.

593 Our results are in accordance with studies in other coniferous species demonstrating that  
594 speciation is likely initiated through ecological barriers, and several generations of hybridization  
595 might occur before the evolution of intrinsic barriers to gene flow (Hamilton *et al.* 2013; Zhou *et al.*  
596 *et al.* 2014; Stacy *et al.* 2017). Integrating the existing genomic dataset with ongoing planting  
597 experiments involving climate treatments and measurements of fitness related traits should also  
598 help resolve the joint influence of extrinsic and intrinsic isolating mechanisms. Specifically, co-  
599 incidence between the steepness of genomic, geographic, and trait specific clines would indicate  
600 a dominant role of extrinsic factors in facilitating divergence and speciation (Holliday *et al.*  
601 2010; De La Torre *et al.* 2015; Stankowski *et al.* 2015; Ryan *et al.* 2017). Alternatively, the  
602 presence of several loci showing steep clines, but lacking climatic or functional associations



603 would indicate a dominance of intrinsic barriers (Ryan *et al.* 2017). Although the genomic cline  
604 analysis used in this study provided key insights into a complexity of species isolation, it lacks  
605 sufficient power to account for complex epistatic effects (Gompert & Buerkle 2011). These have  
606 likely played a key role in ecological speciation and in initiating the evolution of reproductive  
607 isolation (Lindtke *et al.* 2012; Flaxman *et al.* 2014). Ultimately, furthering genomic resources  
608 will help test whether absolute measures of divergence are correlated with recombination rate,  
609 and will account for the non-random genomic distribution of climate-associated genes and their  
610 tendency to co-localize in areas of reduced recombination (Wolf & Ellegren 2016). This study,  
611 however, provides concrete evidence of ecological speciation with gene flow, the presence of a  
612 historical hybrid zone maintained by extrinsic factors, and early stages of coupling between  
613 disruptive selection and intrinsic barriers contributing towards diversification. Whether these  
614 patterns hold generally for speciation within conifers, given their life history characteristics as  
615 well as their complex and large genomes, is thus a worthwhile area of future research.

616

## 617 **Acknowledgements**

618 This research was funded by U.S. National Science Foundation (NSF) grants EF-1442486  
619 (Eckert), and EF-1442597 (Waring), as well as by Northern Arizona University's Technology  
620 Research Initiative Program, USDA Forest Service Forest Health Protection Gene conservation  
621 program, USDA Forest Service National Fire Plan Award 01.RMRS.B.6 (Schoettle), Virginia  
622 Commonwealth University (VCU) Department of Biology, and VCU Integrated Life Sciences.  
623 We thank Z. Gompert and T. Parchman for providing R code that aided plotting the BGC results.  
624 We also acknowledge our field sampling and lab work crew (see Supporting information,  
625 Appendix S1.D). This work would not have been possible without generous computational



Menon *et al.*: Ecological speciation in pines

626 resources provided by the VCU Center for High Performance Computing and the Brigham  
627 Young University Fulton Supercomputing Lab.

## 628 **References**

- 629
- 630 Agrawal AF, Feder JL, Nosil P (2011) Ecological Divergence and the Origins of Intrinsic Postmating  
631 Isolation with Gene Flow. *International Journal of Ecology*, **2011**, e435357.
- 632 Aguirre-Gutiérrez J, Serna-Chavez HM, Villalobos-Arambula A et al (2015) Similar but not equivalent:  
633 ecological niche comparison across closely-related Mexican white pines. *Diversity and*  
634 *Distributions*, **21**, 245-257.
- 635 Aiello-Lammens ME, Boria RA, Radosavljevic A, Vilela B, Anderson RP (2015) spThin: an R package  
636 for spatial thinning of species occurrence records for use in ecological niche models. *Ecography*,  
637 **38**, 541–545.
- 638 Allen CD & Breshears DD (1998). Drought-induced shift of a forest–woodland ecotone: Rapid landscape  
639 response to climate variation. *Proc. Nat. Acad Sci.* **95**, 14839–14842.
- 640 Alberto FJ, Aitken SN, Alía R *et al.* (2013) Potential for evolutionary responses to climate change –  
641 evidence from tree populations. *Global Change Biology*, **19**, 1645–1661.
- 642 Andrew RL & Rieseberg LH (2013). Divergence is focused on few genomic regions early in speciation:  
643 incipient speciation of sunflower ecotypes. *Evolution*, **67**, 2468–2482.
- 644 Barton NH (2001) The role of hybridization in evolution. *Molecular Ecology*, **10**, 551–568.
- 645 Barton NH, De Cara MAR (2009) The Evolution of Strong Reproductive Isolation. *Evolution*, **63**, 1171–  
646 1190.
- 647 Barton NH, Hewitt GM (1985) Analysis of Hybrid Zones. *Annual Review of Ecology and Systematics*, **16**,  
648 113–148.
- 649 Benkman CW, Balda RP, Smith CC (1984) Adaptations for Seed Dispersal and the Compromises Due to  
650 Seed Predation in Limber Pine. *Ecology*, **65**, 632–642.
- 651 Bierne N, Welch J, Loire E, Bonhomme F, David P (2011) The coupling hypothesis: why genome scans  
652 may fail to map local adaptation genes: The coupling hypothesis. *Molecular Ecology*, **20**, 2044–  
653 2072.
- 654 Bisbee J (2014) Cone morphology of the *Pinus ayacahuite-flexilis* complex of the southwestern United  
655 States and Mexico. *Bulletin of the Cupressus conservation project*, **3**, 3–33.
- 656 Bivand R, Keitt T, Rowlingson B *et al.* (2017) *rgdal: Bindings for the Geospatial Data Abstraction*  
657 *Library*.

- 658 Borgman EM, Schoettle AW, Angert AL (2015) Assessing the potential for maladaptation during active  
659 management of limber pine populations: a common garden study detects genetic differentiation in  
660 response to soil moisture in the Southern Rocky Mountains. *Canadian Journal of Forest*  
661 *Research*, **45**, 496–505.
- 662 Bridle JR, Vines TH (2007) Limits to evolution at range margins: when and why does adaptation fail?  
663 *Trends in Ecology & Evolution*, **22**, 140–147.
- 664 Burnham KP, Anderson DR (2002) *Model selection and multimodel inference: a practical information-*  
665 *theoretic approach*. Springer, New York.
- 666 Buschiazzi E, Ritland C, Bohlmann J, Ritland K (2012). Slow but not low: genomic comparisons reveal  
667 slower evolutionary rate and higher dN/dS in conifers compared to angiosperms. *BMC*  
668 *Evolutionary Biology*, **12**, 8.
- 669 Carstens BC, Brennan RS, Chua V *et al.* (2013) Model selection as a tool for phylogeographic inference:  
670 an example from the willow *Salix melanopsis*. *Molecular Ecology*, **22**, 4014–4028.
- 671 Christe C, Stölting KN, Paris M *et al.* (2017) Adaptive evolution and segregating load contribute to the  
672 genomic landscape of divergence in two tree species connected by episodic gene flow. *Molecular*  
673 *Ecology*, **26**, 59–76.
- 674 Coyne J, Orr HA (1989) Patterns of speciation in *Drosophilla*. *Evolution*, **43**, 362–381.
- 675 Critchfield WB (1986). Hybridization and classification of the white pines (*Pinus* section *Strobus*).  
676 *Taxon*, **35**, 647–656.
- 677 Cruickshank TE, Hahn MW (2014) Reanalysis suggests that genomic islands of speciation are due to  
678 reduced diversity, not reduced gene flow. *Molecular Ecology*, **23**, 3133–3157.
- 679 Cullingham CI, Cooke JEK, Coltman DW (2014) Cross-species outlier detection reveals different  
680 evolutionary pressures between sister species. *The New Phytologist*, **204**, 215–229.
- 681 De Carvalho D, Ingvarsson PK, Joseph J *et al.* (2010) Admixture facilitates adaptation from standing  
682 variation in the European aspen (*Populus tremula* L.), a widespread forest tree. *Molecular*  
683 *Ecology*, **19**, 1638–1650.
- 684 De La Torre AR, Birol I, Bousquet J *et al.* (2014a) Insights into Conifer Giga-Genomes. *Plant*  
685 *Physiology*, **166**, 1724–1732.
- 686 De La Torre AR, Wang T, Jaquish B, Aitken SN (2014b) Adaptation and exogenous selection in a *Picea*  
687 *glauca* × *Picea engelmannii* hybrid zone: implications for forest management under climate  
688 change. *The New Phytologist*, **201**, 687–699.
- 689 De La Torre AR, Ingvarsson PK, & Aitken SN (2015). Genetic architecture and genomic patterns of gene  
690 flow between hybridizing species of *Picea*. *Heredity*, **115**, 153–164.

Menon *et al.*: Ecological speciation in pines

- 691 De La Torre, A. R., Li, Z., Van de Peer, Y., & Ingvarsson, P. K. (2017). Contrasting Rates of Molecular  
692 Evolution and Patterns of Selection among Gymnosperms and Flowering Plants. *Molecular*  
693 *Biology and Evolution*, *34*(6), 1363-1377. Chicago
- 694 de Lafontaine G, Prunier J, Gérardi S & Bousquet J. (2015). Tracking the progression of speciation:  
695 variable patterns of introgression across the genome provide insights on the species delimitation  
696 between progenitor–derivative spruces (*Picea mariana* × *P. rubens*). *Molecular Ecology*, **24**,  
697 5229–5247.
- 698 Dodd RS, Afzal-Rafii Z (2004) Selection and dispersal in a multispecies oak hybrid zone. *Evolution*, **58**,  
699 261–269.
- 700 Feder JL, Egan SP, Nosil P (2012) The genomics of speciation-with-gene-flow. *Trends in Genetics*, **28**,  
701 342–350.
- 702 Fitzpatrick BM (2012) Estimating ancestry and heterozygosity of hybrids using molecular markers. *BMC*  
703 *Evolutionary Biology*, **12**, 131.
- 704 Fitzpatrick BM (2013) Alternative forms for genomic clines. *Ecology and Evolution*, **3**, 1951–1966.
- 705 Flaxman SM, Wacholder AC, Feder JL, Nosil P (2014) Theoretical models of the influence of genomic  
706 architecture on the dynamics of speciation. *Molecular Ecology*, **23**, 4074–4088.
- 707 Geraldès A, Farzaneh N, Grassa CJ *et al.* (2014) The Landscape genomics of *Populus trichocarpa*: the  
708 role of hybridization, limited gene flow, and natural selection in shaping patterns of population  
709 structure: population differentiation in *Populus trichocarpa*. *Evolution*, **68**, 3260–3280.
- 710 Gitlin AR, Sthultz CM, Bowker MA *et al* (2006) Mortality Gradients within and among Dominant Plant  
711 Populations as Barometers of Ecosystem Change During Extreme Drought. *Conservation*  
712 *Biology*, **20**, 1477–1486.
- 713 Gompert Z, Buerkle CA (2010) introgress: a software package for mapping components of isolation in  
714 hybrids. *Molecular Ecology Resources*, **10**, 378–384.
- 715 Gompert Z, Buerkle CA (2011) Bayesian estimation of genomic clines. *Molecular Ecology*, **20**, 2111–  
716 2127.
- 717 Gompert Z, Buerkle CA (2012) bgc: Software for Bayesian estimation of genomic clines. *Molecular*  
718 *Ecology Resources*, **12**, 1168–1176.
- 719 Gompert Z, Lucas LK, Buerkle CA *et al.* (2014) Admixture and the organization of genetic diversity in a  
720 butterfly species complex revealed through common and rare genetic variants. *Molecular*  
721 *Ecology*, **23**, 4555–4573.
- 722 Gompert Z, Parchman TL, Buerkle CA (2012a) Genomics of isolation in hybrids. *Philosophical*  
723 *Transactions of the Royal Society B: Biological Sciences*, **367**, 439–450.

- 724 Gompert Z, Lauren LK, Chris NC *et al.* (2012b) Genomic regions with a history of divergent selection  
725 affect fitness of hybrids between two Butterfly Species. *Evolution*, **66**, 2167-2181.
- 726 Goodrich BA, Waring KM, Kolb TE (2016) Genetic variation in *Pinus strobiformis* growth and drought  
727 tolerance from southwestern US populations. *Tree Physiology*, **36**, 1219–1235.
- 728 Goudet J (2005) hierfstat, a package for R to compute and test hierarchical F-statistics. *Molecular*  
729 *Ecology Notes*, **5**, 184–186.
- 730 Gutenkunst RN, Hernandez RD, Williamson SH, Bustamante CD (2009) Inferring the Joint Demographic  
731 History of Multiple Populations from Multidimensional SNP Frequency Data. *PLOS Genetics*, **5**,  
732 e1000695.
- 733 Hamilton JA, Lexer C, Aitken SN (2013) Genomic and phenotypic architecture of a spruce hybrid zone (  
734 *Picea sitchensis* × *P. glauca*). *Molecular Ecology*, **22**, 827–841.
- 735 Hijmans RJ, Cameron SE, Parra JL, Jones PG, Jarvis A (2005) Very high resolution interpolated climate  
736 surfaces for global land areas. *International Journal of Climatology*, **25**, 1965–1978.
- 737 Hijmans RJ, Eten J van, Cheng J *et al.* (2016) *raster: Geographic Data Analysis and Modeling*.
- 738 Hijmans RJ, Phillips S, Elith JL and J (2017) *dismo: Species Distribution Modeling*.
- 739 Holliday JA, Ritland K, & Aitken SN (2010). Widespread, ecologically relevant genetic markers  
740 developed from association mapping of climate-related traits in Sitka spruce (*Picea sitchensis*).  
741 *The New Phytologist*, **188**, 501–514
- 742 Ikeda DH, Max TL, Allan GJ *et al.* (2017) Genetically informed ecological niche models improve climate  
743 change predictions. *Global Change Biology*, **23**, 164–176.
- 744 Janoušek V, Wang L, Luzynski K *et al.* (2012) Genome-wide architecture of reproductive isolation in a  
745 naturally occurring hybrid zone between *Mus musculus musculus* and *M. m. domesticus*.  
746 *Molecular Ecology*, **21**, 3032–3047.
- 747 Kamdem C, Fouet C, Gamez S, White BJ (2016) Genomic signatures of introgression at late stages of  
748 speciation in a malaria mosquito. *bioRxiv*, 068239.
- 749 Kane NC, King MG, Barker MS *et al.* (2009) Comparative genomic and population genetic analyses  
750 indicate highly porous genomes and high levels of gene flow between divergent *Helianthus*  
751 species. *Evolution; international journal of organic evolution*, **63**, 2061–2075.
- 752 Knowles LL, Carstens BC, Keat ML (2007) Coupling Genetic and Ecological-Niche Models to Examine  
753 How Past Population Distributions Contribute to Divergence. *Current Biology*, **17**, 940–946.
- 754 Kulmuni J, Westram AM (2017) Intrinsic incompatibilities evolving as a by-product of divergent  
755 ecological selection: Considering them in empirical studies on divergence with gene flow.  
756 *Molecular Ecology*, **26**, 3093–3103.

Menon *et al.*: Ecological speciation in pines

- 757 Lackey ACR, Boughman JW (2016) Evolution of reproductive isolation in stickleback fish: Evolution of  
758 isolation in stickelback fish. *Evolution*, **71**, 357–372.
- 759 Lexer C, Joseph JA, Loo MV *et al.* (2010). Genomic Admixture Analysis in European *Populus* spp.  
760 Reveals Unexpected Patterns of Reproductive Isolation and Mating. *Genetics*, **186**, 699–712.
- 761 Li X, Zhu C, Yeh CT *et al.* (2012). Genic and nongenic contributions to natural variation of quantitative  
762 traits in maize. *Genome Research*, **22**, 2436–2444.
- 763 Lindtke D, Buerkle CA, Barbará T, *et al.* (2012). Recombinant hybrids retain heterozygosity at many loci:  
764 new insights into the genomics of reproductive isolation in *Populus*. *Molecular Ecology*, **21**,  
765 5042–5058.
- 766 Lindtke D, Gompert Z, Lexer C, Buerkle CA (2014). Unexpected ancestry of *Populus* seedlings from a  
767 hybrid zone implies a large role for postzygotic selection in the maintenance of species.  
768 *Molecular Ecology*, **23**, 4316–4330.
- 769 Lind BM, Freidline CJ, Wegrzyn JL *et al.* (2017) Water availability drives signatures of local adaptation  
770 in whitebark pine (*Pinus albicaulis* Englm.) across fine spatial scales of the Lake Tahoe Basin,  
771 USA. *Molecular Ecology*, **26**, 3168-3185.
- 772 Looney CE, Waring KM (2013) *Pinus strobiformis* (southwestern white pine) stand dynamics,  
773 regeneration, and disturbance ecology: A review. *Forest Ecology and Management*, **287**, 90–102.
- 774 Looney CE, Waring KM, Fairweather ML (2015) Monitoring the health of *Pinus strobiformis*: early  
775 impacts of white pine blister rust invasion. In: Forest Health Monitoring: National Status, Trends,  
776 and Analysis. USDA Forest service, pp:167-175.
- 777 Losos JB, Arnold SJ, Bejerano G *et al.* (2013) Evolutionary Biology for the 21st Century. *PLoS Biology*,  
778 **11**.
- 779 Lotterhos KE & Whitlock MC (2015) The relative power of genome scans to detect local adaptation  
780 depends on sampling design and statistical method. *Molecular Ecology*, **24**, 1031-1046.
- 781 Marques DA, Lucek K, Haesler MP *et al.* (2017). Genomic landscape of early ecological speciation  
782 initiated by selection on nuptial colour. *Molecular Ecology*, **26**, 7–24.
- 783 Mastretta-Yanes A, Moreno-Letelier A, Piñero D, Jorgensen TH, Emerson BC (2015) Biodiversity in the  
784 Mexican highlands and the interaction of geology, geography and climate within the Trans-  
785 Mexican Volcanic Belt. *Journal of Biogeography*, **42**, 1586–1600.
- 786 McVean G (2009). A Genealogical Interpretation of Principal Components Analysis. *PLOS Genetics*, **5**,  
787 e100068
- 788 Milne RI, Terzioglu S, Abbott RJ (2003) A hybrid zone dominated by fertile F1s: maintenance of species  
789 barriers in *Rhododendron*. *Molecular Ecology*, **12**, 2719–2729.
- 790 Mishra AK, Singh VP (2010). A review of drought concepts. *Journal of Hydrology*, **391**, 202-216.

- 791 Moore WS (1977) An Evaluation of Narrow Hybrid Zones in Vertebrates. *The Quarterly Review of*  
792 *Biology*, **52**, 263–277.
- 793 Moreno-Letelier A & Piñero D (2009) Phylogeographic structure of *Pinus strobiformis* Engelm. across  
794 the Chihuahuan Desert filter-barrier. *Journal of Biogeography*, **36**, 121-131.
- 795 Moreno-Letelier A, Barraclough TG (2015) Mosaic genetic differentiation along environmental and  
796 geographic gradients indicate divergent selection in a white pine species complex. *Evolutionary*  
797 *Ecology*, **29**, 733–748.
- 798 Moreno-Letelier A, Ortíz-Medrano A, Piñero D (2013) Niche Divergence versus Neutral Processes:  
799 Combined Environmental and Genetic Analyses Identify Contrasting Patterns of Differentiation  
800 in Recently Diverged Pine Species. *PLoS ONE*, **8**, e78228.
- 801 Neale DB, Kremer A (2011) Forest tree genomics: growing resources and applications. *Nature Reviews*  
802 *Genetics*, **12**, 111–122.
- 803 Noor MF, Bennett SM (2009) Islands of speciation or mirages in the desert? Examining the role of  
804 restricted recombination in maintaining species. *Heredity*, **103**, 439–444.
- 805 Nosil P (2008) Speciation with gene flow could be common. *Molecular Ecology*, **17**, 2103–2106.
- 806 Nosil P, Feder JL (2012) Genomic divergence during speciation: causes and consequences. *Phil. Trans.*  
807 *R. Soc. B*, **367**, 332–342.
- 808 Nosil P, Harmon LJ, Seehausen O (2009) Ecological explanations for (incomplete) speciation. *Trends in*  
809 *Ecology & Evolution*, **24**, 145–156.
- 810 Ortego J, Gugger PF, Riordan EC, Sork VL (2014) Influence of climatic niche suitability and  
811 geographical overlap on hybridization patterns among southern Californian oaks (B Emerson,  
812 Ed.). *Journal of Biogeography*, **41**, 1895–1908.
- 813 Ortego J, Noguerales V, Gugger PF, Sork VL (2015) Evolutionary and demographic history of the  
814 Californian scrub white oak species complex: an integrative approach. *Molecular Ecology*, **24**,  
815 6188–6208.
- 816 Parchman TL, Gompert Z, Braun MJ *et al.* (2013) The genomic consequences of adaptive divergence and  
817 reproductive isolation between species of manakins. *Molecular Ecology*, **22**, 3304–3317.
- 818 Parchman TL, Gompert Z, Mudge J *et al.* (2012) Genome-wide association genetics of an adaptive trait in  
819 lodgepole pine: Association mapping of serotiny. *Molecular Ecology*, **21**, 2991–3005.
- 820 Patterson N, Price AL, Reich D (2006) Population Structure and Eigenanalysis. *PLOS Genetics*, **2**, e190
- 821 Pavy N, Pelgas B, Laroche J, Rigault P, Isabel N, & Bousquet, J. (2012). A spruce gene map infers  
822 ancient plant genome reshuffling and subsequent slow evolution in the gymnosperm lineage  
823 leading to extant conifers. *BMC Biology*, **10**, 84.



Menon *et al.*: Ecological speciation in pines

- 824 Peterson BK, Weber JN, Kay EH, Fisher HS, Hoekstra HE (2012) Double Digest RADseq: An  
825 Inexpensive Method for De Novo SNP Discovery and Genotyping in Model and Non-Model  
826 Species. *PLOS ONE*, **7**, e37135.
- 827 Petit RJ, Excoffier L (2009) Gene flow and species delimitation. *Trends in Ecology & Evolution*, **24**,  
828 386–393.
- 829 Petit RJ, Hampe A (2006) Some Evolutionary Consequences of Being a Tree. *Annual Review of Ecology,*  
830 *Evolution, and Systematics*, **37**, 187–214.
- 831 Phillips SJ, Anderson RP, Schapire RE (2006) Maximum entropy modeling of species geographic  
832 distributions. *Ecological Modelling*, **190**, 231–259.
- 833 Pritchard JK, Rienzo AD (2010) Adaptation – not by sweeps alone. *Nature Reviews Genetics*, **11**, 665–  
834 667.
- 835 Puritz JB, Hollenbeck CM, Gold JR (2014) *dDocent*: a RADseq, variant-calling pipeline designed for  
836 population genomics of non-model organisms. *PeerJ*, **2**, e431.
- 837 R Core Team (2017) R: A Language and Environment for Statistical Computing. Vienna, Austria: the R  
838 Foundation for Statistical Computing. *R Foundation for Statistical Computing, Vienna, Austria*.
- 839 Raj A, Stephens M, Pritchard JK (2014) fastSTRUCTURE: Variational Inference of Population Structure  
840 in Large SNP Data Sets. *Genetics*, **197**.
- 841 Rajora OP, Eckert AJ, Zinck JWR (2016) Single-Locus versus Multilocus Patterns of Local Adaptation to  
842 Climate in Eastern White Pine (*Pinus strobus*, Pinaceae). *PLOS ONE*, **11**, e0158691.
- 843 Rambaut, Suchard, Marc, Drummond, Alexei (2013) Tracer, Version 1.6.
- 844 Rehfeldt GE (1999) Systematics and genetic structure of Ponderosae taxa (Pinaceae) inhabiting the  
845 mountain islands of the Southwest. *Am J Bot*, **86**, 741-752.
- 846 Restaino CM, Peterson DL, Littell J (2016). Increased water deficit decreases Douglas fir growth  
847 throughout western US forests. *Proceedings of the National academy of Sciences*, **113**, 9557-  
848 9562.
- 849 Riquet F, Haag-Liautard C, Woodall L *et al.* (2017) Parallel use of a shared genomic island of speciation  
850 in clinal and mosaic hybrid zones between cryptic seahorse lineages. *bioRxiv*, 161786
- 851 Roesti M, Hendry AP, Salzburger W, Berner D (2012) Genome divergence during evolutionary  
852 diversification as revealed in replicate lake-stream stickleback population pairs. *Molecular*  
853 *Ecology*, **21**, 2852–2862.
- 854 Rundle HD (2002) A test of ecologically dependent postmating isolation between sympatric sticklebacks.  
855 *Evolution*, **56**, 322–329.
- 856 Ryan S, Fontaine MC, Scriber JM *et al.* (2017) Patterns of divergence across the geographic and genomic  
857 landscape of a butterfly hybrid zone associated with a climatic gradient. *bioRxiv*, 149179.

- 858 Savolainen O, Lascoux M, Merilä J (2013) Ecological genomics of local adaptation. *Nature Reviews*  
859 *Genetics*, **14**, 807–820.
- 860 Schield DR, Adams RH, Card DC *et al.* (2017) Insight into the roles of selection in speciation from  
861 genomic patterns of divergence and introgression in secondary contact in venomous rattlesnakes.  
862 *Ecology and Evolution*, **7**, 3951–3966.
- 863 Schluter D, Conte GL (2009) Genetics and ecological speciation. *Proceedings of the National Academy of*  
864 *Sciences*, **106**, 9955–9962.
- 865 Shirk AJ, Cushman SA, Wehenkel CA *et al.* (2017) Southwestern white pine (*Pinus strobiformis*) species  
866 distribution models predict large range shift and contraction due to climate change. *Forest*  
867 *Ecology & Management (in review)*.
- 868 Sork VL, Aitken SN, Dyer RJ *et al.* (2013) Putting the landscape into the genomics of trees: approaches  
869 for understanding local adaptation and population responses to changing climate. *Tree Genetics*  
870 *& Genomes*, **9**, 901–911.
- 871 Stacy EA, Paritosh B, Johnson MA, Price DK (2017) Incipient ecological speciation between  
872 successional varieties of a dominant tree involves intrinsic postzygotic isolating barriers. *Ecology*  
873 *and Evolution*, **7**, 2501–2512.
- 874 Stankowski S, Sobel JM, Streisfeld MA (2015) The geography of divergence with gene flow facilitates  
875 multitrait adaptation and the evolution of pollinator isolation in *Mimulus aurantiacus*. *Evolution*,  
876 **69**, 3054–3068.
- 877 Steinhoff RJ, Andresen JW (1971) Geographic variation in *Pinus flexilis* and *Pinus strobiformis* and its  
878 bearing on their taxonomic status. *Silvae Genet*, **20**, 159–167.
- 879 Tine M, Kuhl H, Gagnaire P-A *et al.* (2014) European sea bass genome and its variation provide insights  
880 into adaptation to euryhalinity and speciation. *Nature Communications*, **5**.
- 881 Tomback DF, Achuff P (2010) Blister rust and western forest biodiversity: ecology, values and outlook  
882 for white pines. *Forest Pathology*, **40**, 186–225.
- 883 Tomback DF, Samano S, Pruett EL, Schoettle AW, others (2011) Seed dispersal in limber and  
884 southwestern white pine: comparing core and peripheral populations. In: *The Future of High-*  
885 *Elevation, Five-Needle White Pines in Western North America: Proceedings of the High Five*  
886 *Symposium. Proceedings RMRS-P-63. Fort Collins, CO: US Department of Agriculture, Forest*  
887 *Service, Rocky Mountain Research Station*, pp. 69–71.
- 888 Via S, Bouck AC, Skillman S (2000) Reproductive isolation between divergent races of pea aphids on  
889 two hosts. II. Selection against migrants and hybrids in the parental environments. *Evolution*, **54**,  
890 1626–1637.



Menon *et al.*: Ecological speciation in pines

- 891 Vogan PJ, Schoettle AW (2015). Selection for resistance to white pine blister rust affects the abiotic stress  
892 tolerances of limber pine. *Forest Ecology and Management*, **344**, 110-119.
- 893 Warren DL, Glor RE, Turelli M (2008) Environmental niche equivalency versus conservatism:  
894 quantitative approaches to niche evolution. *Evolution*, **62**, 2868–2883.
- 895 Williams AP, Allen CD, Millar CI, Swetnam TW *et al.* (2010). Forest responses to increasing aridity and  
896 warmth in the southwestern United States. *Proceedings of the National Academy of Sciences*. **107**,  
897 21289-21294.
- 898 Wolf JBW & Ellegren H (2016). Making sense of genomic islands of differentiation in light of speciation.  
899 *Nature Reviews Genetics*, **18**, 87–100.
- 900 Wu CI (2001) The genic view of the process of speciation. *Journal of Evolutionary Biology*, **14**, 851–865.
- 901 Yang RC (1998). Estimating hierarchical *F*-statistics. *Evolution*, **52**, 950-956.
- 902 Yeaman S, Otto SP (2011). Establishment and Maintenance of Adaptive Genetic Divergence Under  
903 Migration, Selection, and Drift. *Evolution*, **65**, 2123–2129.
- 904 Yeaman S, Aeschbacher S, Bürger R (2016) The evolution of genomic islands by increased establishment  
905 probability of linked alleles. *Molecular Ecology*, **25**, 2542–2558.
- 906 Zhou Y, Zhang L, Liu J, Wu G, Savolainen O (2014) Climatic adaptation and ecological divergence  
907 between two closely related pine species in Southeast China. *Molecular Ecology*, **23**, 3504–3522.

908  
909

910 **Data accessibility**

911 Raw reads generated during this study are available at NCBI SRA database (SRXXXXXXXXX).  
912 Genotype file following SNP calling in O12 format and admixture proportions per individual tree  
913 are available at Dryad (doi: XXXX).

914

915 **Author contributions**

916 The study was designed by KMW, AVW, AJE, LFR, CW, and SC. Field sampling was  
917 performed by AWS, FMF, LFR, MSG, CW, ALS, and KMW. Funding for this study was  
918 procured by KMW, AWS, and AJE. MM, JCB and CF performed the data analysis. MM  
919 generated the genomic data and wrote the manuscript. All authors edited the article and have  
920 approved the version for submission.

921 **Table 1.** Ecological niche model performance and variable importance at 30 arc-second resolution

| Groups             | AUC  | RTG  | RTG importance <sup>#</sup>            | Permutation importance <sup>‡</sup>          | Percent contribution <sup>‡</sup> | Regression coefficient importance <sup>*</sup> |
|--------------------|------|------|----------------------------------------|----------------------------------------------|-----------------------------------|------------------------------------------------|
| <b>Core</b>        | 0.97 | 2.51 | Bio15 <sup>1</sup> , Bio4 <sup>2</sup> | Bio4                                         | Altitude                          | Bio4                                           |
| <b>Periphery</b>   | 0.99 | 3.92 | Bio9 <sup>3</sup>                      | Bio10 <sup>4</sup> , Bio9, Bio6 <sup>5</sup> | Altitude                          | Bio15                                          |
| <i>P. flexilis</i> | 0.94 | 1.72 | Altitude                               | Altitude                                     | Altitude                          | Altitude                                       |

922 AUC: Area under the curve; RTG: Regularized training gain

923 #: Variables that caused maximum reduction in the total RTG when omitted from the model and the variable with the most contribution to RTG

924 \*: Sum of absolute values of regression coefficient ( $\lambda$ ) across various predictor transformations or feature classes used in MAXENT

925 ‡: Variables with the highest permutation or percentage importance

926 <sup>1</sup>Precipitation seasonality, <sup>2</sup>Temperature seasonality, <sup>3</sup>Mean temperature of the driest quarter, <sup>4</sup>Mean temperature of the warmest quarter, <sup>5</sup>Minimum temperature  
 927 of the coldest month

928 **Table 2.** Estimates of genetic diversity and divergence within and across the three groups, compared to a genome-wide  $F_{ST}$ -species of  
 929 0.02 (95% CI: 0.008–0.03) and  $F_{ST}$ -strobiformis of 0.009 (95% CI: 0.007–0.014).

| <b>Group</b>              | <b>Multilocus <math>F_{ST}</math><br/>(95% CI)</b> | <b>Pairwise <math>F_{ST}</math><br/>(95% CI)</b>                          | <b>Mean <math>H_e \pm</math> s.d.</b> | <b>Mean <math>H_o \pm</math> s.d.</b> |
|---------------------------|----------------------------------------------------|---------------------------------------------------------------------------|---------------------------------------|---------------------------------------|
| <b>Core</b>               | 0.003 (0.0025–0.0034)                              | periphery: 0.009(0.001–0.023)<br><i>P. flexilis</i> : 0.019 (0.006–0.032) | 0.135 $\pm$ 0.01                      | 0.111 $\pm$ 0.01                      |
| <b>Periphery</b>          | 0.007(0.0071–0.0073)                               | <i>P. flexilis</i> : 0.015 (0.005–0.024)<br>core: 0.009(0.001–0.023)      | 0.133 $\pm$ 0.02                      | 0.105 $\pm$ 0.03                      |
| <b><i>P. flexilis</i></b> | 0.003 (0.0025 – 0.0041)                            | core: 0.019 (0.006–0.032)<br>periphery: 0.015 (0.005–0.024)               | 0.130 $\pm$ 0.01                      | 0.111 $\pm$ 0.01                      |

930 **Table 3. Model composite likelihoods and AIC model selection results for 11 alternative demographic models of *P. strobiformis***  
 931 **(core and periphery)–*P. flexilis* divergence.** The best supported model, that with the minimum AIC score (hence,  $\Delta\text{AIC}_i = 0$ ), is  
 932 underlined, and the two best models are shown in boldface.  
 933

| Model                   | Model description                                                                                                                       | $\ln$ Composite likelihood | $k$             | AIC                   | $\Delta\text{AIC}_i$ |
|-------------------------|-----------------------------------------------------------------------------------------------------------------------------------------|----------------------------|-----------------|-----------------------|----------------------|
| $M_1$                   | Strict isolation, no gene flow                                                                                                          | –883.143112                | 6               | 1778.29               | 65.44                |
| $M_2$                   | Secondary contact (Periphery– <i>P. flexilis</i> )                                                                                      | –886.227416                | 7               | 1786.45               | 73.60                |
| $M_3$                   | Ancient gene flow (speciation with gene flow)                                                                                           | –888.003307                | 7               | 1790.01               | 77.16                |
| <b><math>M_4</math></b> | <b><u>Ancient gene flow, plus Periphery–<i>P. flexilis</i> gene flow</u></b>                                                            | <b><u>–847.424540</u></b>  | <b><u>9</u></b> | <b><u>1712.85</u></b> | <b><u>0.00</u></b>   |
| $M_5$                   | Ancient gene flow, plus Core–periphery gene flow                                                                                        | –885.428135                | 9               | 1788.86               | 76.01                |
| $M_6$                   | Secondary contact (Periphery– <i>P. flexilis</i> ) and Core–Periphery gene flow                                                         | –883.949484                | 10              | 1787.90               | 75.05                |
| $M_7$                   | Ancient gene flow, followed by Periphery– <i>P. flexilis</i> gene flow, and Core–Periphery gene flow                                    | –892.210862                | 9               | 1806.42               | 93.57                |
| <b><math>M_8</math></b> | <b>Heterogeneous ancient gene flow</b>                                                                                                  | <b>–869.824520</b>         | <b>14</b>       | <b>1757.65</b>        | <b>44.80</b>         |
| $M_9$                   | Heterogeneous ancient gene flow, plus Core–Periphery gene flow                                                                          | –884.511096                | 11              | 1791.02               | 78.17                |
| $M_{10}$                | Heterogeneous gene flow during secondary contact (Periphery– <i>P. flexilis</i> ), and Core–Periphery gene flow                         | –902.279445                | 9               | 1828.56               | 115.71               |
| $M_{11}$                | Heterogeneous ancient gene flow, followed by heterogeneous gene flow between Periphery– <i>P. flexilis</i> , and between Core–Periphery | –922.814525                | 11              | 1873.63               | 160.78               |

934 AIC, Akaike information criterion;  $k$ , the number of parameters in the model;  $\ln$ , natural logarithm.

935 **Figure Captions**

936 **Fig. 1.** Map of sampling localities (black dots) overlaid on polygons showing geographical  
937 ranges of *Pinus strobiformis* (green) and *P. flexilis* (blue). The corresponding locality  
938 information is available in Table S1 of the Supporting Information.

939 **Fig. 2.** Results of niche divergence tests (Schoener's  $D$ ) for all pairwise comparisons among  
940 groups. Histograms indicate the background levels of niche divergence and arrows  
941 indicate the observed value of Schoener's  $D$  for each pair compared.

942 **Fig. 3A)** Results of population genetic structure analysis using PCA on 51 633 SNPs. **B)** Results  
943 of assignment analyses for each tree in FASTSTRUCTURE for  $K = 2$  clusters (right panel)  
944 plotted onto a topographic map of the study area (left panel). Each pie chart represents  
945 the average ancestry of a population from *P. strobiformis* and *P. flexilis*.

946 **Fig. 4.** The best-supported model from  $\hat{\partial A \hat{\partial} I}$  analysis. This figure shows the optimized parameter  
947 estimates for divergence times ( $T_i$ ) in units of millions of years ago (Ma), reference  
948 effective population size (theta; or after conversion,  $N_{\text{ref}}$ ), lineage population sizes ( $N_i$ ),  
949 and rates of gene flow ( $M_{ij}$ ) for the optimal model determined by AIC model selection  
950 (see results in Table 2).

951 **Fig. 5A)** Genomic distribution of  $F_{CT}$  **B)** frequency distribution of hybrid index **C)** variation in  
952 genomic ancestry as a function of hybrid index **D)** correlation between genomic cline  
953 parameters, and **E)** 3D correlation plot of genomic cline parameters and  $F_{CT}$

954

955

956

957

958

959

960

## 961 **Supporting Information**

962 **Table S1.** Sampling locations used in this study, their classification into Core and Periphery, and  
963 mean admixture proportions.

964 **Table S2.** Raw and converted parameter estimates from the  $\partial A \partial I$  model that was best-supported  
965 by AIC model selection.

966 **Fig. S1.** Schematics and parameter details for each of the 11 demographic models for the  
967 divergence of core and periphery groups within *P. strobiformis* and *P. flexilis* run in our  $\partial A \partial I$   
968 analysis. Parameters include divergence times ( $T_i$ ), population sizes ( $N_i$ ), homogeneous rates of  
969 gene flow ( $M_{ij}$ , gene flow from lineage  $j$  to  $i$ ) and genomically heterogeneous rates of gene flow  
970 ( $M_{ijh}$ ).

971 **Fig. S2.** Ecological niche model projections for Core, Periphery, and *P. flexilis*, under present  
972 and past climate

973 **Fig. S3. A)** Climate PCA with variables used in the ENMs **B)** Distribution of precipitation  
974 seasonality (Bio15) at presence locations of Core & Periphery.

975 **Appendix S1.A)** Filtering of occurrence records and ENM details, **B)** Bioinformatic pipeline for  
976 processing raw ddRADseq reads, and **C)** Down-sampling of SNP loci for demographic modeling  
977 using  $\partial A \partial I$ . **D)** List of volunteers and technicians involved in sampling and library preparation.

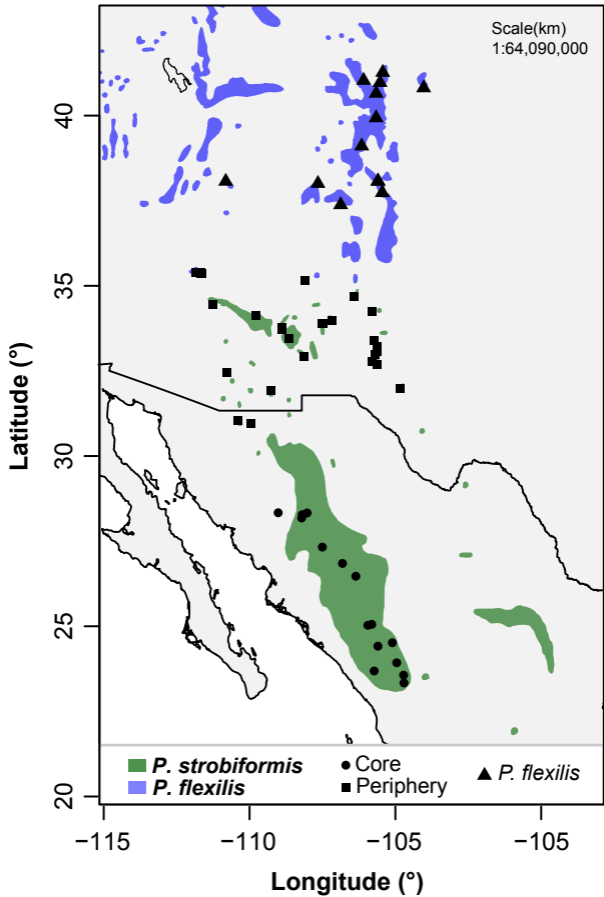



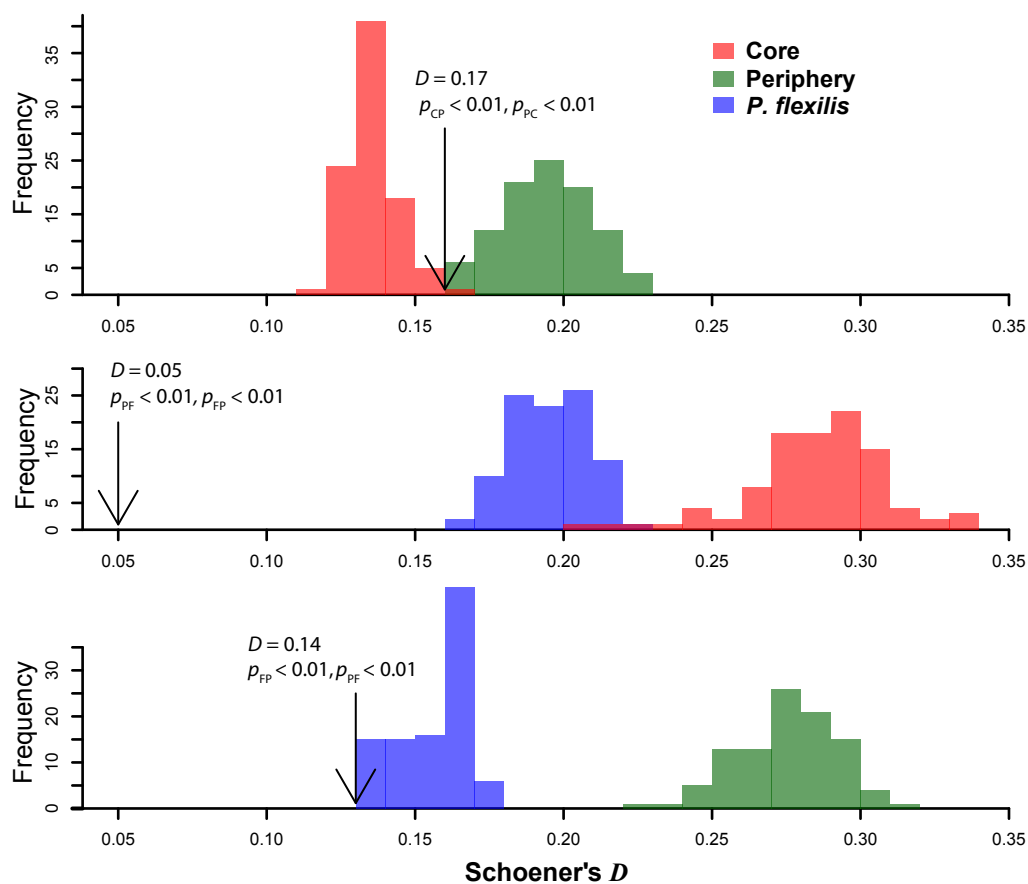

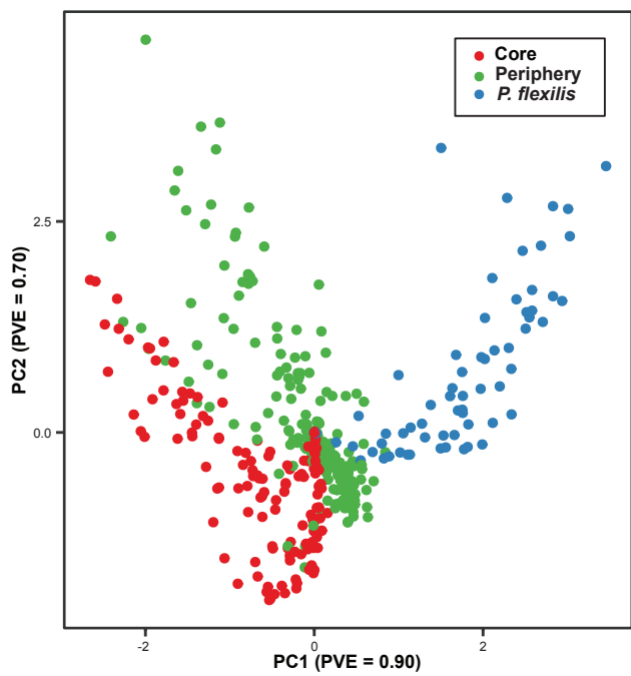

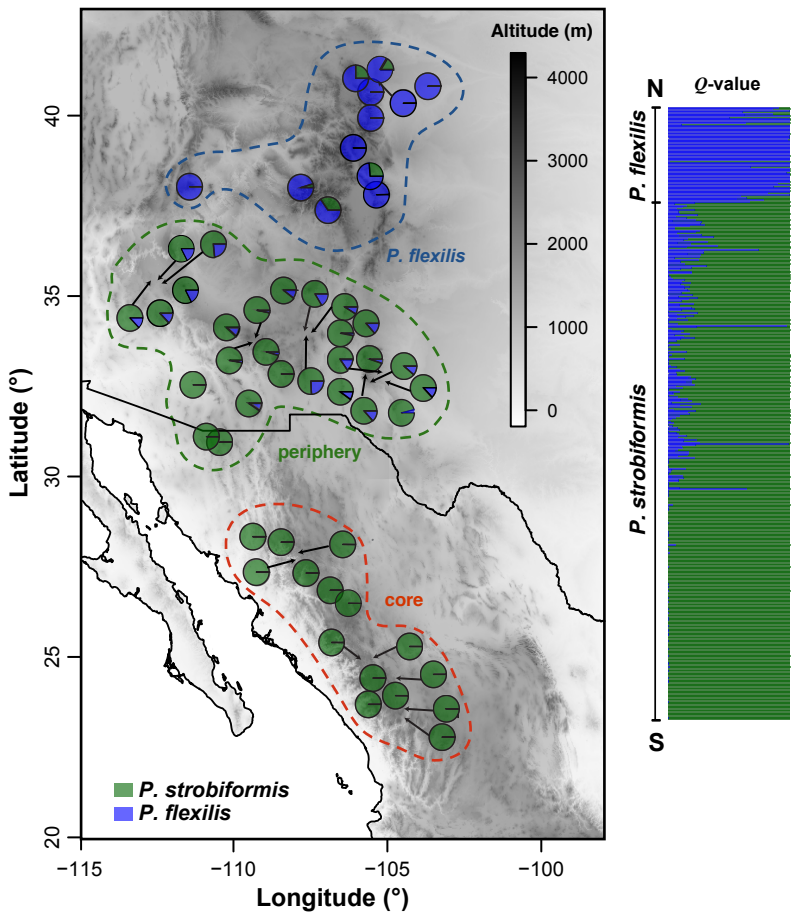

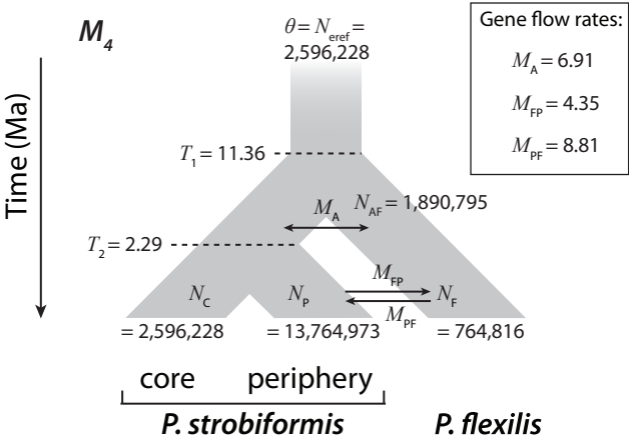

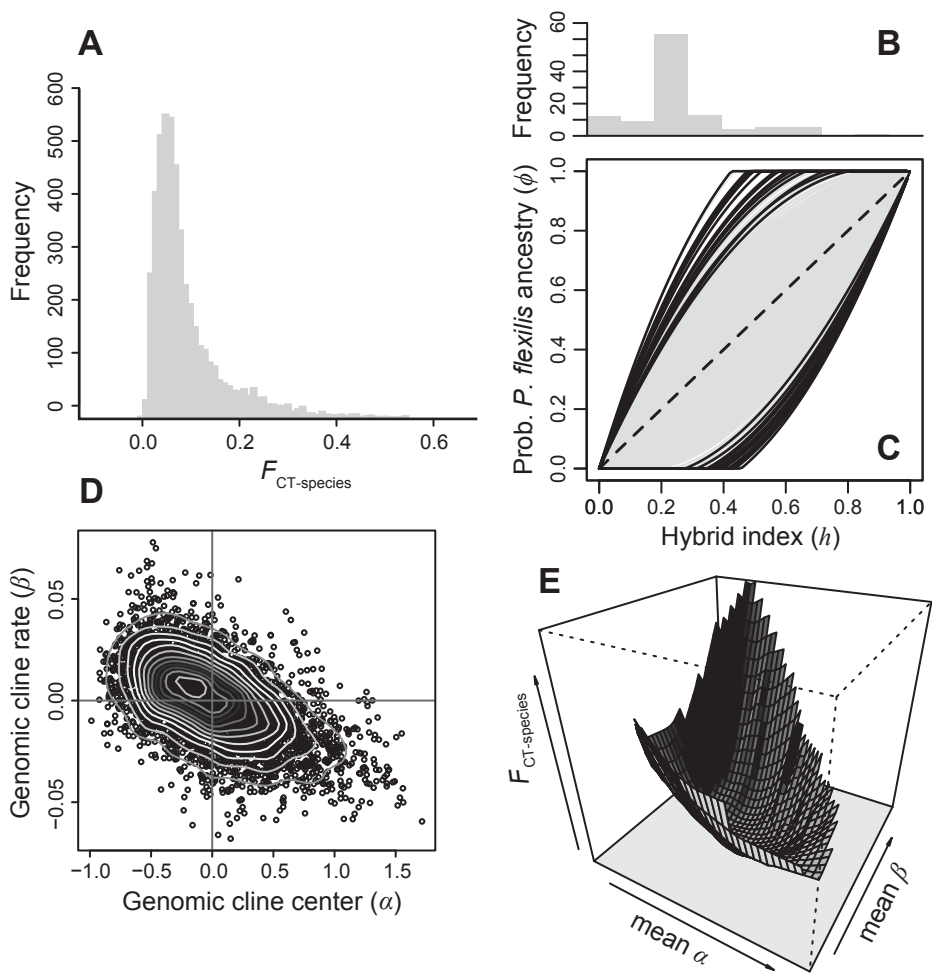

Source: https://www.biorxiv.org/content/10.1101/185728v1.full.pdf
